## 1 Division of labor during biofilm matrix production

2

3 Anna Dragoš<sup>1,2,7</sup>, Heiko Kiesevalter<sup>1,8</sup>, Marivic Martin<sup>1,2,9</sup>, Chih-Yu Hsu<sup>3</sup>, Raimo Hartmann<sup>4</sup>, Tobias  
4 Wechsler<sup>5</sup>, Knut Drescher<sup>4,6,10</sup>, Nicola Stanley-Wall<sup>3,11</sup>, Rolf Kümmerli<sup>5,12</sup>, Ákos T. Kovács<sup>1,2,#,13</sup>

5

6 <sup>1</sup> Bacterial Interactions and Evolution Group, Department of Biotechnology and Biomedicine, Technical  
7 University of Denmark, Kgs Lyngby, 2800, Denmark

8 <sup>2</sup> Terrestrial Biofilms Group, Institute of Microbiology, Friedrich Schiller University Jena, Jena, 07743,  
9 Germany

10 <sup>3</sup> School of Life Sciences, University of Dundee, Dundee, DD1 5EH, United Kingdom

11 <sup>4</sup> Max Planck Institute for Terrestrial Microbiology, Marburg, 35043, Germany

12 <sup>5</sup> Department of Plant and Microbial Biology, University of Zürich, Zürich, 8057, Switzerland

13 <sup>6</sup> Department of Physics, Philipps University, Marburg, 35037, Germany

14

15 Correspondence: atkovacs@dtu.dk

16 # Lead contact

17 <sup>7</sup> Twitter: @Anna\_Dragos

18 <sup>8</sup> Twitter: @h\_kiesevalter

19 <sup>9</sup> Twitter: @MartinMavs

20 <sup>10</sup> Twitter: @knutdrescher

21 <sup>11</sup> Twitter: @Bacteriacities

22 <sup>12</sup> Twitter: @RoflsMicrobes

23 <sup>13</sup> Twitter: @EvolvedBiofilm

24

25

## 26 Summary

27

28 Organisms as simple as bacteria can engage in complex collective actions, such as group motility and  
29 fruiting body formation. Some of these actions involve a division of labor, where phenotypically  
30 specialized clonal subpopulations, or genetically distinct lineages cooperate with each other by  
31 performing complementary tasks. Here, we combine experimental and computational approaches to  
32 investigate any benefits arising from division of labor during biofilm matrix production. We show that  
33 both phenotypic and genetic strategies for a division of labor can promote collective biofilm formation  
34 in the soil bacterium *Bacillus subtilis*. In this species, biofilm matrix consists of two major components;  
35 EPS and TasA. We observed that clonal groups of *B. subtilis* phenotypically segregate in three  
36 subpopulations composed of matrix non-producers, EPS-producers, and generalists, which produce  
37 both EPS and TasA. We further found that this incomplete phenotypic specialization was  
38 outperformed by a genetic division of labor, where two mutants, engineered as strict specialists,

39 complemented each other by exchanging EPS and TasA. The relative fitness of the two mutants  
40 displayed a negative frequency dependence both *in vitro* and on plant roots, with strain frequency  
41 reaching an evolutionary stable equilibrium at 30% TasA-producers, corresponding exactly to the  
42 population composition where group fitness is maximized. Using individual-based modelling, we could  
43 show that asymmetries in strain ratio can arise due to differences in the relative benefits that matrix  
44 compounds generate for the collective; and that genetic division of labor can be favored when it  
45 breaks metabolic constraints associated with the simultaneous production of two matrix components.

46

47

48 **Key words:** division of labor, biofilm, *Bacillus subtilis*, phenotypic heterogeneity, cooperation,  
49 competition, EPS, TasA

50

51

52 **Highlights:**

53

54 - matrix components EPS and TasA are costly public goods in *B. subtilis* biofilms

55 - genetic division of labor using  $\Delta eps$  and  $\Delta tasA$  fosters maximal biofilm productivity

56 -  $\Delta eps$  and  $\Delta tasA$  cooperation is evolutionary stable in laboratory and ecological systems

57 - costly metabolic coupling of public goods favors genetic division of labor

58

59

60 **Introduction**

61

62 Microbes can act collectively in groups, and thereby substantially influence their local environment in  
63 their own benefit. Such beneficial collective actions include the secretion of nutrient-degrading  
64 enzymes [1,2], iron-scavenging siderophores [3], biosurfactants for group motility [4,5], and structural  
65 components for biofilm formation [6,7]. In certain cases, cooperation even involves a division of labor,  
66 where subpopulations of cells specialize to perform different tasks [8–10]. For instance, during sliding  
67 colony expansion *Bacillus subtilis* cells phenotypically differentiate into surfactant producers and  
68 matrix producers where the role of the first is to reduce surface tension, while the latter allows  
69 expanding colony ‘arms’ to form and explore new territories [10]. Given the high relatedness between  
70 cells, specialization is likely beneficial for the group as a whole [11,12], with individuals gaining an  
71 inclusive fitness benefit from helping their clone mates [13–16]. However, division of labor has  
72 recently also been documented between genetically different strains or species [17–19]. Cooperative  
73 division of labor based on genetic differentiation seems to evolve both frequently and reproducibly

74 [18,20], lending support for the so-called Black Queen hypothesis, which depicts the microbial world  
75 as a network of interdependencies between species [21].

76

77 While our understanding of phenotypically and genetically determined forms of division of labor in  
78 microbes deepens [10,17,18,22,23], it has remained unclear what the pros and cons of the two forms  
79 of division of labor are, and which form yields higher fitness returns for the specialists and the  
80 community as a whole. When considering division of labor based on the exchange of two beneficial  
81 public goods, a phenotypic specialization could offer advantages because cells producing the two  
82 public goods will naturally be close to one another due to binary cell division. Close spatial proximity  
83 is essential for efficient public good sharing [24,25], yet might be compromised with genetically  
84 determined division of labor, as spatial separation of partners can readily occur and the switching of  
85 specialization states is not possible [26]. Conversely, genetically determined division of labor might  
86 offer advantages because it allows a complete decoupling of traits at the metabolic level. The  
87 metabolic costs saved due to trait decoupling is likely lower in the case of phenotypic heterogeneity,  
88 because each cell might still simultaneously invest in both traits, albeit to varying extents. Finally, it  
89 has been argued that in contrast to phenotypic differentiation, terminal genetic divergence bears risks  
90 of conflicts such as social exploitation because relatedness between interacting partners is reduced;  
91 potentially leading to diverging interests between partners [26].

92

93 Here, we focus on identifying the trade-offs associated with different division of labor strategies for  
94 biofilm formation in the in the common soil and plant-colonizing bacterium *B. subtilis*, in terms of  
95 individual and population-level fitness.

96 Biofilms represent the most common lifestyle of bacteria, where cells are in close proximity to one  
97 another, embedded in extracellular matrix (ECM) [27]. There is ample opportunity for division of labor  
98 over matrix construction, because ECM usually consists of multiple secreted compounds that form a  
99 mesh of complex exopolysaccharides (EPS) and structural proteins, sometimes accompanied by  
100 extracellular DNA (eDNA). While the presence of eDNA can be the consequence of cell death [28], the  
101 production of matrix exopolysaccharides and proteins tends to be triggered by cooperative signaling  
102 [29,30], cues released by competitors [31], or specific nutrient components [32,33]. As the synthesis  
103 of large polymers is metabolically costly, tight regulation of matrix gene expression is often in place,  
104 and it has been suggested that the overall metabolic costs for the community may be reduced by  
105 assigning matrix production only to a subpopulation of cells [34]. Here we propose an alternative  
106 scenario involving division of labor, where subgroups of individuals within a biofilm each specialize

107 (either phenotypically or genetically) in the production of a different matrix component, which are  
108 then shared at the level of the group.

109

110 Our model system involves *B. subtilis* forming robust, wrinkly pellicle biofilms that reside at the oxygen  
111 rich liquid-air interface [35]. Increasing cell density of the planktonic cells results in a decreasing  
112 oxygen concentration in the bottom layers of the static medium. Aerotaxis of *B. subtilis* leads to an  
113 accumulation of cells near the liquid-air interface and eventually a colonization of the surface in a form  
114 of a densely packed pellicle biofilm. During pellicle development transcription of the matrix-related  
115 operons *epsA-O* and *tapA-sipW-tasA* is derepressed [34,36–38] eventually allowing synthesis of the  
116 biofilm exopolysaccharide (EPS), and the structural protein TasA [39,40]. Mutants lacking either EPS  
117 or TasA cannot establish pellicle biofilms individually, but they can complement each other in co-  
118 culture, indicating that both matrix components are necessary for pellicle biofilms and that they are  
119 shared [39,41,42].

120

121 Using a mixture of fitness assays, single-cell gene expression analyses and mathematical modelling,  
122 we show that the two matrix components EPS and TasA are indeed costly to produce. We further  
123 found that cells within a biofilm phenotypically differentiate into three distinct subpopulations  
124 consisting of cells producing either both of the matrix components, EPS alone, or none of the two  
125 components. We then demonstrate that in terms of group-level fitness, genetic division of labor for  
126 matrix construction is superior to the phenotypic differentiation strategy present in the wild type.  
127 Specifically, biofilm productivity was maximized at an intermediate mixing ratio of mutants deficient  
128 for either EPS or TasA, both in pellicle biofilms grown in the laboratory, and in biofilms grown on plant  
129 hosts. Crucially, the  $\Delta eps : \Delta tasA$  proportion at which biofilm productivity maximization occurred,  
130 represents an evolutionary stable equilibrium.

131

## 132 **RESULTS**

133

### 134 **The matrix components EPS and TasA serve as costly public goods**

135 Components of bacterial extracellular matrix are often large, complex polymers, which can potentially  
136 bear significant metabolic production costs [2,43–45]. To demonstrate the costs associated with the  
137 production of EPS and TasA in our *B. subtilis* strain (NCBI 3610), we competed the non-producing  
138 mutants  $\Delta eps$  and  $\Delta tasA$  against the wild type (WT) under conditions where matrix is synthesized but  
139 not required for survival [46], which is up to 16 hours of growth, prior to surface colonization (Movie  
140 S1; see Methods). We confirmed that in the pre-pellicle phase the WT,  $\Delta eps$ , and  $\Delta tasA$  strains first

141 grow exponentially before reaching the early stationary phase (Figure S1A), and express the  
142 corresponding matrix component (Figure S1B,C, assays based on fluorescent transcriptional reporters  
143  $P_{eps}\text{-}gfp$  and  $P_{tapA}\text{-}gfp$ ). Under these conditions, our growth competition fitness assay revealed  
144 significant costs for both matrix components (Figure 1A). The fact that  $\Delta eps$  had significantly higher  
145 relative fitness than  $\Delta tasA$  in pairwise competition against the WT suggests that EPS synthesis bears a  
146 higher cost than TasA production under these conditions (Figure 1A).

147

148 Next, we examined sharing of the two components. We began with complementation assays mixing  
149 the two mutants ( $\Delta eps$  and  $\Delta tasA$  single deletion mutants) in 1:1 ratios. In line with previous reports  
150 [39,41,42], we found that the mutants could not establish pellicles when grown in monocultures, but  
151 complemented each other when co-cultured, indicating that EPS and TasA can be shared (Figure 1B,C).  
152 Since TasA was previously depicted as a cell-associated amyloid fiber, anchored through the accessory  
153 protein TapA to the cell [41], we performed additional experiments to confirm cross-  
154 complementation. Specifically, we added conditioned media from the EPS and TasA producers to  
155 growing cultures of the  $\Delta eps$  and  $\Delta tasA$ , respectively, and quantified their surface colonization ability.  
156 We observed that the conditioned medium from the WT or the complementary mutant significantly  
157 improved pellicle formation as compared to the control, with the effect being more pronounced for  
158 the  $\Delta eps$  than the  $\Delta tasA$  mutant (Figure 1D).

159

160 As the above results (Figure 1D) suggest that the matrix components EPS and TasA differ in the extent  
161 to which they are shared, pointing towards stronger privatization of TasA, we hypothesized that  
162 efficient spatial mixing of EPS-producers and TasA-producers is necessary for successful  
163 complementation. To test the role of mixing we took advantage of a previously observed motility  
164 effect on cell assortment in pellicle biofilms [47]: Cells lacking a functional flagellum ( $\Delta hag$ ) are less  
165 efficient in swimming to the top of the liquid, which likely results in very low number of founder cells  
166 carrying the  $\Delta hag$  mutation (compared to WT) in the pellicle. As a result, pellicles formed by two  
167 isogenic  $\Delta hag$  strains labeled with different fluorophores, contain large clusters of cells of the same  
168 lineage, indicating limited genotype mixing [47]. As expected, the efficiency of complementation  
169 between EPS- and TasA-producers was negatively affected in the  $\Delta hag$  genetic background as  
170 compared to the control with functional flagella (Figure S2A). Finally, the spatial assortment of cells in  
171 the pellicles formed by mixtures of  $\Delta eps$  and  $\Delta tasA$  and pellicles formed by the WT were compared  
172 using a density correlation function quantification method (see Methods), to assess the spatial effects  
173 of genetic division of labor (Figure S2B-D). The level of spatial strain mixing was slightly higher in

174 pellicles formed by mixtures of  $\Delta eps$  and  $\Delta tasA$  (regardless of the fluorescence reporter combination)  
175 as compared to pellicles formed by the WT (Figure S2C,D).

176

177 Altogether, these results confirm that both matrix components EPS and TasA can be shared and that  
178 robust pellicle biofilm formation depends on the efficient exchange of these compounds.

179

### 180 **Wild type cells exhibit phenotypic heterogeneity in the expression of matrix components**

181 As EPS and TasA are costly to produce (Figure 1A) and can both be shared between the producers and  
182 non-producers (Figure 1B-D), we hypothesized that phenotypic differentiation into EPS-producers and  
183 TasA-producers could occur and form the basis of a division of labor in WT *B. subtilis* populations  
184 during pellicle formation. To test for phenotypic heterogeneity of *eps* and *tasA* expression at the single  
185 cell level, we used a reporter strain carrying a promoter fusion of the *eps* promoter to *gfp* ( $P_{eps}$ -*gfp*)  
186 and an analogous reporter for the *tapA* promoter based on *mKate* ( $P_{tapA}$ -*mKate*) at two distinct  
187 genomic loci (see Methods, Table S1). As a control, we used the  $P_{tapA}$ -*gfp*  $P_{tapA}$ -*mKate* strain (see  
188 Methods, Table S1) for which no phenotypic heterogeneity and a linear correlation between the two  
189 fluorescence channels was expected. Fluorescent images of mature pellicles of the WT  $P_{eps}$ -*gfp*  $P_{tapA}$ -  
190 *mKate* strain and the control WT  $P_{tapA}$ -*gfp*  $P_{tapA}$ -*mKate* strain were captured using confocal laser  
191 scanning microscopy (CLSM). While the control strain showed a clear spatial correlation between GFP  
192 and mKate fluorescence intensities, this was not the case for the WT  $P_{eps}$ -*gfp*  $P_{tapA}$ -*mKate* strain (Figure  
193 2A). Specifically, large bright clusters of strong GFP signal could be observed in locations in which there  
194 was reduced mKate fluorescence, suggesting the presence of a subpopulation that is partially  
195 specialized for EPS production (Figure 2A). While quantitative analysis confirmed that for the  $P_{tapA}$ -*gfp*  
196  $P_{tapA}$ -*mKate* biofilm, signal intensities from GFP and mKate channels showed strong linear correlation  
197 in space, this correlation was much weaker in case of  $P_{eps}$ -*gfp*  $P_{tapA}$ -*mKate* (Figure 2B, Figure S3A).

198

199 The above experiment suggests that matrix-expressing subpopulations of WT *B. subtilis* exhibit a  
200 certain degree of phenotypic differentiation into cells that produce mostly EPS and cells that produce  
201 both EPS and TasA (generalists). To confirm this pattern, we analyzed single cells extracted from  
202 pellicles using fluorescence-guided flow cytometry (FC). FC analyses was performed at 3 time points  
203 during pellicle development (24, 48 and 72 hours) and included controls with strains carrying single  
204 reporter fusions (see Methods, Table S1). These analyses revealed the presence of 3 distinct  
205 subpopulations of cells: (i) matrix-OFF cells where fluorescence signals from both the  $P_{eps}$  and  $P_{tapA}$   
206 promoters were below the detection thresholds; (ii) matrix-ON cells where there was a positive linear  
207 correlation of the signals from the  $P_{eps}$  and  $P_{tapA}$  promoters: (iii) EPS-ON cells, containing a fluorescent  
208 signal from  $P_{eps}$ , but not from  $P_{tapA}$  (Figure 2C, Figure S3B). Differences in relative frequencies of  $P_{eps}$ -

209 *gfp* and  $P_{tapA}$ -*mKate* ON cells were not due to the use of different fluorescent reporters, as evidenced  
210 by our FC control experiments where strains carrying either a  $P_{tapA}$ -*gfp* or a  $P_{tapA}$ -*mKate* showed  
211 identical frequencies of ON cells (Figure S3C,D). Thus, our FC experiments confirmed that the  
212 expression of the two major matrix promoters  $P_{eps}$  and  $P_{tapA}$  is not perfectly correlated, which likely  
213 translates into phenotypic diversity at the level of EPS and TasA production in wild type *B. subtilis*  
214 pellicles.

215

### 216 **Genetic division of labor yields higher biofilm productivity than phenotypic differentiation**

217 Although the above data indicate that wild type cells differentiate into EPS-producers, generalists, and  
218 non-producers during pellicle biofilm formation, this pattern does not resemble the canonical  
219 principle of division of labor where distinct subpopulations of cells are expected to either commit  
220 completely to TasA or EPS production. The incomplete specialization could be due to regulatory  
221 constraints. For instance, it is known that the *epsA-O* and *tapA-sipW-tasA* operons share multiple  
222 regulators, suggesting that some level of parallel expression (either on or off) at the single cell level is  
223 expected [48–51].

224

225 We thus wondered whether an incomplete specialization represents a beneficial strategy or whether  
226 it can be outperformed by a genetically determined specialization, where cells are ultimately  
227 constrained in the production of either TasA or EPS. To address this question, we studied the division  
228 of labor between  $\Delta tasA$  as the exclusive EPS-producer and  $\Delta eps$  as the exclusive TasA producer. In a  
229 first experiment, we mixed the exclusive EPS- and TasA-producers at different ratios and examined  
230 the productivities of pellicles (Figure 3A). We found that pellicle productivity varied in response to  
231 strain frequency, and peaked at a strain ratio of approximately 30 %  $\Delta eps$  : 70%  $\Delta tasA$  (Figure 3A).  
232 Interestingly, the group fitness of mixtures close to this optimal ratio was significantly higher than the  
233 WT productivity, indicating that the genetic division of labor over matrix construction outperforms the  
234 native phenotypic differentiation observed in the WT (Figure 3A).

235

### 236 **Genetic division of labor is evolutionarily stable in pellicles and on plant roots**

237 We next asked whether such genetic division of labor, which yields the highest fitness returns at a  
238 strain ratio of approximately 30:70, is an evolutionary stable strategy or simply a transient  
239 phenomenon. To test this possibility, we competed the  $\Delta eps$  strain against the  $\Delta tasA$  strain across a  
240 range of frequencies (1% to 99 %), over the full cycle of pellicle growth (from inoculation until  
241 formation of robust, wrinkly pellicle after 48 hours). These competitions revealed that the relative  
242 fitness of  $\Delta eps$  followed a negative frequency-dependent pattern:  $\Delta eps$  outcompeted  $\Delta tasA$  when  
243 rare, but lost the competition when common (Fig. 3B). Strikingly, the two strains showed equal

244 competitiveness at starting frequencies between 20% - 30%  $\Delta eps$ , thus exactly at the strain ratio  
245 where biofilm productivity is maximized. These findings strongly suggest that, regardless of the  
246 metabolic cost imbalance between the two matrix components, stable coexistence of the EPS and  
247 TasA producers is favored in the pellicle, with strain frequency evolving towards the optimum in terms  
248 of biofilm biomass productivity (Figure 1A, Figure 3B).

249  
250 To test whether stable genetic division of labor could also manifest in a relevant ecological  
251 environment, we repeated several key experiments using plant root associated biofilms. Specifically,  
252 we subjected the roots of *Arabidopsis thaliana* seedlings to colonization by the WT, or a mixture of  
253  $\Delta eps$  and  $\Delta tasA$  strains at a 50:50 ratio, or monocultures of the two mutants (see Methods). Each  
254 strain carried a constitutive fluorescent reporter to allow biofilm visualization by CLSM (see methods,  
255 Table S1). In line with previous studies [52], both the WT and the mixture of  $\Delta eps$  and  $\Delta tasA$  strains  
256 were able to produce thick biofilms on the roots, which was not the case for the  $\Delta eps$  and  $\Delta tasA$   
257 mutants grown in monocultures on the plant root (Figure 4A, Figure S4A). Analogous to the pellicles,  
258 we found that the productivity of root biofilms was significantly higher for the  $\Delta eps$  +  $\Delta tasA$  mixture  
259 as compared to the WT. Next, we estimated the relative frequencies of  $\Delta eps$  and  $\Delta tasA$  mutants in the  
260 mixed biofilm on the root, based on total pixel volumes (see methods), and found that the mutant  
261 frequency settled at the optimal ratio of 20% - 30%  $\Delta eps$  (Figure 4B,C, Figure S4B). In contrast, the  
262 frequency remained close to 0.5:0.5 in our control mixtures of two WT strains labeled with different  
263 fluorescent reporters (Figure 4B,C). Altogether, our experiments demonstrate that the genetically  
264 hard-wired division of labor between EPS- and TasA-producers provides fitness benefits not only in  
265 pellicles, but also on plant roots.

266

267

### 268 **Decoupling of metabolic constraints favors the evolution of genetic division of labor**

269 To better understand the conditions required for genetic division of labor to evolve between EPS- and  
270 TasA-producing specialists, we used an individual-based modelling platform, specifically developed to  
271 simulate multi-strain microbial interactions [53]. The platform consisted of a two-dimensional toroidal  
272 surface measuring 100 x 100  $\mu\text{m}$ . Bacteria were modeled as discs with an initial diameter of 0.5  $\mu\text{m}$ .  
273 They are seeded in low numbers to their *in-silico* habitat, where they could consume resources, grow,  
274 divide, disperse, and produce public goods according to specified parameters (see methods for fitness  
275 equations).

276

277 In a first set of simulations, we seeded the habitat with wildtype (WT) bacteria that simultaneously  
278 produce two complementary public goods, representing EPS and TasA. Simulations started with eight



279 cells placed in the center of the landscape to mimic the early phase of pellicle formation. Cells were  
280 allowed to slowly grow at a basic growth rate ( $\mu$ ), and divide without the need of public goods. Cells  
281 produced diffusible public goods at a constant rate. Public goods diffused randomly, could decay or  
282 generate fitness benefits for receiver cells. While each public good generates a benefit on its own,  
283 synergistic benefits accrue to cells that encounter the two complementary public goods within a  
284 certain time frame. Simulations stopped after 10,000 time steps before populations reach stationary  
285 phase. Using this setup, we found biofilm productivity in the WT to peak with lower public good  
286 diffusion coefficients  $d$  (Figure S5A), indicating that reduced diffusion minimizes the loss of public  
287 goods and improves sharing. Since our experimental results suggest that there are differences  
288 between TasA and EPS in the level of sharing, and thus in the relative benefit they can generate for  
289 the pellicle population, we varied this parameter in our model, but found that it did not affect the  
290 productivity of WT pellicles (Figure S5B). Next, we implemented metabolic constraints ( $f$ ), and  
291 observed that biofilm productivity declined whenever the cost of simultaneously producing two public  
292 goods exceeds the sum of each individual public good ( $f > 1$ ; Figure S5C).

293

294 We then asked whether the two mutants  $\Delta eps$  and  $\Delta tasA$  can complement each other as observed in  
295 our empirical experiments. When seeding our landscape with different ratios of the two mutants, we  
296 found that the two strains, specializing in either TasA or EPS production, could indeed complement  
297 each other, with population-level productivity peaking at intermediate mixing ratios, for all public  
298 good diffusion coefficients tested (Figure 5A, Figure S6A). Moreover, the relative fitness of the  $\Delta eps$   
299 strain exhibited negative-frequency dependence (Figure 5B, Figure S6B), and the point of intersection  
300 where none of the two strains experience a relative fitness advantage occurs exactly at the fitness  
301 peak of the group. Next, we implemented the experimental observation that TasA yields lower  
302 benefits than EPS into our simulations. Successful complementation also occurred under these  
303 conditions. Overall, pellicle productivity reached higher levels and peaks shifted to lower frequencies  
304 of  $\Delta eps$  the greater the benefit imbalances between the public goods were (Figure 5C, Figure S6C).  
305 The relative fitness of  $\Delta eps$  again followed negative-frequency dependence with the point of  
306 intersection being exactly at the pellicle fitness peak (Figure 5D, Figure S6D). The excellent qualitative  
307 match between our experimental and theoretical findings indicates that negative-frequency  
308 dependent fitness might be a general feature of public good complementation.

309

310 Finally, we asked whether genetic division of labor between  $\Delta eps$  and  $\Delta tasA$  outperforms the WT  
311 strategy. However, in the absence of any metabolic constraints ( $f = 1$ ), the WT pellicle productivity was  
312  $1714 \pm 39$  cells after 10,000 time steps (mean  $\pm$  SE, with  $d = 5$ ), and thus the productivity was far higher

313 than in any of the complementation scenarios (Figure 5). Conversely, when the WT faces metabolic  
314 constraints, we found a parameter space ( $f > 1.1$ ), in which pellicle productivity of complementing  
315 strains exceeds wildtype performance (Figure 5C). Taken together, our simulations recover the key  
316 features of our experimental system, and suggest that the decoupling of metabolic constraints is the  
317 main trigger for the evolution of genetic division of labor.

318

319

## 320 **DISCUSSION**

321

322 Despite their unicellular simplicity, microbes can coordinate complex behaviors as a group. Some of  
323 these multicellular behaviors involve division of labor between phenotypically distinct subpopulations  
324 [10,23,54,55], or even different genetic lineages [18]. Here we deployed a combination of experiments  
325 and simulations to directly compare these two alternative cooperative strategies. By focusing on the  
326 production of two biofilm matrix components in *B. subtilis*, we found evidence for significant, yet  
327 incomplete phenotypic specialization in matrix production among clonal cells of the wild type strain.  
328 However, this strategy of phenotypic specialization was outperformed by genetic division of labor,  
329 where strains, engineered as strict specialists, settled on an evolutionary equilibrium ratio that  
330 maximized biofilm productivity. Our individual-based modeling approach captures the experimental  
331 system and reveals that metabolic decoupling of two costly traits can be the key to success for genetic  
332 specialization.

333

334 While we demonstrate that *B. subtilis* WT displays partial phenotypic differentiation at the level of  
335 matrix production, we might ask why this form of specialization is not more pronounced, especially in  
336 the context of the reported fitness benefits that can accrue from complete genetic specialization (Fig.  
337 3A). One explanation might be that the *epsA-O* and *tapA-sipW-tasA* operons share multiple regulators,  
338 such that some level of parallel expression is inevitable [48–51]. Still, there could be certain  
339 mechanisms in place to decouple EPS and TasA production, for example a positive feedback where  
340 EPS prevents autophosphorylation of the EpsAB kinase, allowing activation of the EpsE glycosyl-  
341 transferase, thereby promoting EPS-synthesis [56]. It was also proposed that the major matrix  
342 repressor SinR, acts differently on  $P_{eps}$  and  $P_{tapA}$  promoters. Specifically, in the case of  $P_{eps}$  it directly  
343 competes with an activator RemA for the binding site upstream of the promoter, thereby serving as  
344 an anti-activator, while in case of  $P_{tapA}$  it binds simultaneously with RemA, probably serving as a  
345 repressor [51]. The opposing relationship between SinR and RemA may lead to an outburst of *epsA-O*  
346 expression in a subpopulation of cells, while *tapA-sipW-tasA* remains under tighter control of SinR.

347 While these regulatory mechanisms could allow for some heterogeneity in gene expression, complete  
348 specialization seems impossible.

349

350 Our findings on successful genetic division of labor between specialized strains, producing either EPS  
351 or TasA, show that strain frequency settles as a stable frequency of approximately 70:30, and not at  
352 an equal ratio, as one might naively expect. Our model suggests that the dominance of EPS-producers  
353 in biofilms may be driven by a higher relative benefit of EPS compared with TasA. We can only  
354 speculate why such an asymmetry in relative benefits of EPS and TasA might occur. Perhaps, by  
355 analogy to marine exopolysaccharides [57], EPS provides buoyancy which is required for liquid-air  
356 interface colonization (as observed during spent media complementation assay). Recent work  
357 suggests that the structural functionality of TasA fibers may directly depend on the presence of EPS in  
358 the extracellular environment [58]. The 70% : 30% population structure is stable in typical laboratory  
359 setup (pellicle biofilms) and in plant root-associated biofilms.

360

361 Although the genetic division of labor arose as the winning strategy, our study also points towards the  
362 canonical problem associated with fixed cooperation strategies: limited mixing of strains prevents  
363 efficient genetic division of labor [26]. Specifically, we found that the complementation between EPS-  
364 and TasA-producers was ineffective in experiments with flagellum-deficient strains, which exhibit a  
365 decreased level of spatial mixing, thereby reducing public good sharing and the formation of robust  
366 pellicle biofilms. Mathematical models ([59], our model) suggest that complementation is most  
367 efficient when strain mixing is high, but the diffusion of public goods is reduced, conditions that foster  
368 efficient public good exchange between neighbors and prevent losses due to diffusion. A further  
369 complication is that the goods to be exchanged might often vary in their diffusion properties. Our  
370 assays, for instance, suggest that the diffusion and sharing of TasA is rather limited compared to EPS.  
371 We argue that such low diffusion rates must be compensated by an increased spatial mixing of the  
372 cooperation partners. Therefore, in opposition to “xenophobic” mechanisms employed by microbes  
373 to avoid strangers [8,60–63], “xenophilic” strategies might be crucial for genetic division of labor [64].

374

375 In conclusion, our study offers major insights into the evolution of division of labor. First, it shows that  
376 genetic specialization can be superior over phenotypic division of labor because it enables to break  
377 metabolic and regulatory constraints prevailing in organisms that remain totipotent. Second,  
378 sophisticated genetic division of labor can occur in simple organisms such as bacteria. Finally, genetic  
379 division of labor can represent an evolutionary stable strategy, with strain frequency evolving towards  
380 an equilibrium that maximizes group fitness. It is important to note that de novo mutations may occur

381 in the long term and disturb the observed equilibrium. For instance, a double mutant  $\Delta eps\Delta tasA$ ,  
382 which is deficient in both matrix components could exploit the complementing partners and derail the  
383 genetic division of labor. The task of future studies will be to experimentally test whether the reported  
384 cases of genetic division of labor are evolutionary stable in the long run.

385

386

### 387 **Author Contributions**

388 A.D. and Á.T.K. conceived the project, A.D., H.K., M.M., and C.-Y.H. performed experiments, R.H. and  
389 K.D. analyzed quantitatively the CLSM imaging data, C.-Y.H. and N.S.-W. analyzed the flow cytometry  
390 results, T.W. and R.K. performed modeling and analyzed the simulations. A.D., R.K., and Á.T.K. wrote  
391 and corrected the manuscript. All authors contributed critically to the drafts and gave final approval  
392 for publication.

393

### 394 **Acknowledgement**

395 This work was funded by the Deutsche Forschungsgemeinschaft (DFG) to Á.T.K. (KO4741/2.1) within  
396 the Priority Program SPP1617. A.D. was supported by a fellowship from Alexander von Humboldt  
397 foundation. R.K. was funded by the Swiss National Science Foundation (grant no. PP00P3\_165835) and  
398 the European Research Council (ERC-CoG no. 681295). This work was further supported by BBSRC  
399 grant code BB/P0001335 to N.S.-W., a scholarship from BeautyHsiao Biotech. Inc to C-Y.H., the  
400 European Research Council (ERC-StG no. 716734) and the Human Frontier Science Program  
401 (CDA00084/2015-C) to K.D., and a Start-up grant from the Technical University of Denmark to Á.T.K.  
402 We acknowledge the help of Dr. Rosemary Clarke for assistance with flow cytometry which was  
403 performed at the University of Dundee.

404

### 405 **REFERENCES**

406

- 407 1. Wilder, C.N., Diggle, S.P., and Schuster, M. (2011). Cooperation and cheating in *Pseudomonas*  
408 *aeruginosa*: the roles of the *las*, *rhl* and *pqs* quorum-sensing systems. *ISME J.* 5, 1332–1343.
- 409 2. Drescher, K., Nadell, C.D., Stone, H.A., Wingreen, N.S., and Bassler, B.L. (2014). Solutions to  
410 the public goods dilemma in bacterial biofilms. *Curr. Biol.* 24, 50–55.
- 411 3. Harrison, F., and Buckling, A. (2009). Siderophore production and biofilm formation as linked  
412 social traits. *ISME J.* 3, 632–634.
- 413 4. Xavier, J.B., Kim, W., and Foster, K.R. (2011). A molecular mechanism that stabilizes  
414 cooperative secretions in *Pseudomonas aeruginosa*. *Mol. Microbiol.* 79, 166–79.

- 415 5. Pollak, S., Omer-Bendori, S., Even-Tov, E., Lipsman, V., Bareia, T., Ben-Zion, I., and Eldar, A.  
416 (2016). Facultative cheating supports the coexistence of diverse quorum-sensing alleles. *Proc.*  
417 *Natl. Acad. Sci. U. S. A.* *113*, 2152–7.
- 418 6. Boyle, K.E., Heilmann, S., van Ditmarsch, D., and Xavier, J.B. (2013). Exploiting social evolution  
419 in biofilms. *Curr. Opin. Microbiol.* *16*, 207–12.
- 420 7. Dragoš, A., and Kovács, Á.T. (2017). The peculiar functions of the bacterial extracellular  
421 matrix. *Trends Microbiol.* *25*, 257–266.
- 422 8. Velicer, G.J., and Vos, M. (2009). Sociobiology of the Myxobacteria. *Annu. Rev. Microbiol.* *63*,  
423 599–623.
- 424 9. Strassmann, J.E., and Queller, D.C. (2011). Evolution of cooperation and control of cheating in  
425 a social microbe. *Proc. Natl. Acad. Sci. U. S. A.* *108*, 10855–62.
- 426 10. van Gestel, J., Vlamakis, H., and Kolter, R. (2015). From cell differentiation to cell collectives:  
427 *Bacillus subtilis* uses division of labor to migrate. *PLoS Biol.* *13*, e1002141.
- 428 11. West, S.A., and Cooper, G.A. (2016). Division of labour in microorganisms: an evolutionary  
429 perspective. *Nat. Rev. Microbiol.* *14*, 716–723.
- 430 12. Zhang, Z., Claessen, D., and Rozen, D.E. (2016). Understanding microbial divisions of labor.  
431 *Front. Microbiol.* *7*, 2070.
- 432 13. Hamilton, W.D. (1964). The genetical evolution of social behaviour. I. *J. Theor. Biol.* *7*, 1–16.
- 433 14. Gilbert, O.M., Foster, K.R., Mehdiabadi, N.J., Strassmann, J.E., and Queller, D.C. (2007). High  
434 relatedness maintains multicellular cooperation in a social amoeba by controlling cheater  
435 mutants. *Proc. Natl. Acad. Sci. U. S. A.* *104*, 8913–7.
- 436 15. Ackerman, J.M., and Kenrick, D.T. (2008). The costs of benefits: Help-refusals highlight key  
437 trade-offs of social life. *Personal. Soc. Psychol. Rev.* *12*, 118–140.
- 438 16. Refardt, D., Bergmiller, T., and Kümmerli, R. (2013). Altruism can evolve when relatedness is  
439 low: evidence from bacteria committing suicide upon phage infection. *Proceedings. Biol. Sci.*  
440 *280*, 20123035.
- 441 17. D’Souza, G., and Kost, C. (2016). Experimental evolution of metabolic dependency in bacteria.  
442 *PLoS Genet.* *12*, e1006364.
- 443 18. Kim, W., Levy, S.B., and Foster, K.R. (2016). Rapid radiation in bacteria leads to a division of  
444 labour. *Nat. Commun.* *7*, 10508.
- 445 19. Pande, S., and Kost, C. (2017). Bacterial unculturability and the formation of intercellular  
446 metabolic networks. *Trends Microbiol.* *25*, 349–361.
- 447 20. Germerodt, S., Bohl, K., Lück, A., Pande, S., Schröter, A., Kaleta, C., Schuster, S., and Kost, C.  
448 (2016). Pervasive selection for cooperative cross-feeding in bacterial communities. *PLOS*

- 449 Comput. Biol. 12, e1004986.
- 450 21. Morris, J.J., Lenski, R.E., and Zinser, E.R. (2012). The Black Queen Hypothesis: evolution of  
451 dependencies through adaptive gene loss. *MBio* 3, e00036–12.
- 452 22. Rossetti, V., Schirromeister, B.E., Bernasconi, M. V., and Bagheri, H.C. (2010). The evolutionary  
453 path to terminal differentiation and division of labor in cyanobacteria. *J. Theor. Biol.* 262, 23–  
454 34.
- 455 23. Mohri, K., Kiyota, Y., Kuwayama, H., and Urushihara, H. (2013). Temporal and non-permanent  
456 division of labor during sorocarp formation in the social amoeba *Acytostelium subglobosum* .  
457 *Dev. Biol.* 375, 202–209.
- 458 24. Julou, T., Mora, T., Guillon, L., Croquette, V., Schalk, I.J., Bensimon, D., and Desprat, N. (2013).  
459 Cell-cell contacts confine public goods diffusion inside *Pseudomonas aeruginosa* clonal  
460 microcolonies. *Proc. Natl. Acad. Sci. U. S. A.* 110, 12577–82.
- 461 25. Weigert, M., and Kümmerli, R. (2017). The physical boundaries of public goods cooperation  
462 between surface-attached bacterial cells. *bioRxiv*, 119032.
- 463 26. Oliveira, N.M., Niehus, R., and Foster, K.R. (2014). Evolutionary limits to cooperation in  
464 microbial communities. *Proc. Natl. Acad. Sci. U. S. A.* 111, 17941–6.
- 465 27. Nadell, C.D., Xavier, J.B., and Foster, K.R. (2009). The sociobiology of biofilms. *FEMS*  
466 *Microbiol. Rev.* 33, 206–24.
- 467 28. Jakubovics, N.S., Shields, R.C., Rajarajan, N., and Burgess, J.G. (2013). Life after death: the  
468 critical role of extracellular DNA in microbial biofilms. *Lett. Appl. Microbiol.* 57, 467–475.
- 469 29. Sakuragi, Y., and Kolter, R. (2007). Quorum-sensing regulation of the biofilm matrix genes  
470 (*pel*) of *Pseudomonas aeruginosa*. *J. Bacteriol.* 189, 5383–5386.
- 471 30. Waters, C.M., Lu, W., Rabinowitz, J.D., and Bassler, B.L. (2008). Quorum sensing controls  
472 biofilm formation in *Vibrio cholerae* through modulation of cyclic di-GMP levels and  
473 repression of *vpsT*. *J. Bacteriol.* 190, 2527–36.
- 474 31. Oliveira, N.M., Martinez-Garcia, E., Xavier, J., Durham, W.M., Kolter, R., Kim, W., and Foster,  
475 K.R. (2015). Biofilm formation as a response to ecological competition. *PLOS Biol.* 13,  
476 e1002191.
- 477 32. Shemesh, M., and Chai, Y. (2013). A combination of glycerol and manganese promotes biofilm  
478 formation in *Bacillus subtilis* via histidine kinase KinD signaling. *J. Bacteriol.* 195, 2747–2754.
- 479 33. Marsden, A.E., Grudzinski, K., Ondrey, J.M., DeLoney-Marino, C.R., and Visick, K.L. (2017).  
480 Impact of salt and nutrient content on biofilm formation by *Vibrio fischeri*. *PLoS One* 12,  
481 e0169521.
- 482 34. Chai, Y., Chu, F., Kolter, R., and Losick, R. (2007). Bistability and biofilm formation in *Bacillus*

- 483 *subtilis*. Mol. Microbiol. 67, 254–263.
- 484 35. Branda, S.S., Gonzalez-Pastor, J.E., Ben-Yehuda, S., Losick, R., and Kolter, R. (2001). Fruiting  
485 body formation by *Bacillus subtilis*. Proc. Natl. Acad. Sci. U. S. A. 98, 11621–11626.
- 486 36. Kobayashi, K. (2008). SlrR/SlrA controls the initiation of biofilm formation in *Bacillus subtilis*.  
487 Mol. Microbiol. 69, 1399–1410.
- 488 37. Cozy, L.M., Phillips, A.M., Calvo, R.A., Bate, A.R., Hsueh, Y.-H., Bonneau, R., Eichenberger, P.,  
489 and Kearns, D.B. (2012). SlrA/SinR/SlrR inhibits motility gene expression upstream of a  
490 hypersensitive and hysteretic switch at the level of  $\sigma D$  in *Bacillus subtilis*. Mol. Microbiol. 83,  
491 1210–1228.
- 492 38. Kearns, D.B. (2013). You get what you select for: better swarming through more flagella.  
493 Trends Microbiol. 21, 508–509.
- 494 39. Branda, S.S., Chu, F., Kearns, D.B., Losick, R., and Kolter, R. (2006). A major protein  
495 component of the *Bacillus subtilis* biofilm matrix. Mol. Microbiol. 59, 1229–1238.
- 496 40. Romero, D., Vlamakis, H., Losick, R., and Kolter, R. (2011). An accessory protein required for  
497 anchoring and assembly of amyloid fibres in *B. subtilis* biofilms. Mol. Microbiol. 80, 1155–  
498 1168.
- 499 41. Romero, D., Aguilar, C., Losick, R., and Kolter, R. (2010). Amyloid fibers provide structural  
500 integrity to *Bacillus subtilis* biofilms. Proc. Natl. Acad. Sci. U. S. A. 107, 2230–2234.
- 501 42. Martin, M., Dragoš, A., Hölscher, T., Maróti, G., Bálint, B., Westermann, M., and Kovács, Á.T.  
502 (2017). *De novo* evolved interference competition promotes the spread of biofilm defectors.  
503 Nat. Commun. 8, 15127.
- 504 43. van Gestel, J., Weissing, F.J., Kuipers, O.P., and Kovács, Á.T. (2014). Density of founder cells  
505 affects spatial pattern formation and cooperation in *Bacillus subtilis* biofilms. ISME J. 8, 2069–  
506 79.
- 507 44. Hammerschmidt, K., Rose, C.J., Kerr, B., and Rainey, P.B. (2014). Life cycles, fitness decoupling  
508 and the evolution of multicellularity. Nature 515, 75–79.
- 509 45. Yan, J., Nadell, C.D., Stone, H.A., Wingreen, N.S., and Bassler, B.L. (2017). Extracellular-matrix-  
510 mediated osmotic pressure drives *Vibrio cholerae* biofilm expansion and cheater exclusion.  
511 Nat. Commun. 8, 327.
- 512 46. West, S. a, Griffin, A.S., Gardner, A., and Diggle, S.P. (2006). Social evolution theory for  
513 microorganisms. Nat. Rev. Microbiol. 4, 597–607.
- 514 47. Hölscher, T., Bartels, B., Lin, Y.C., Gallegos-Monterrosa, R., Price-Whelan, A., Kolter, R.,  
515 Dietrich, L.E., and Kovács, Á.T. (2015). Motility, chemotaxis and aerotaxis contribute to  
516 competitiveness during bacterial pellicle biofilm development. J. Mol. Biol. 427, 3695–3708.

- 517 48. López, D., Vlamakis, H., and Kolter, R. (2009). Generation of multiple cell types in *Bacillus*  
518 *subtilis*. FEMS Microbiol. Rev. 33, 152–63.
- 519 49. López, D., and Kolter, R. (2010). Extracellular signals that define distinct and coexisting cell  
520 fates in *Bacillus subtilis*. FEMS Microbiol. Rev. 34, 134–49.
- 521 50. Diethmaier, C., Pietack, N., Gunka, K., Wrede, C., Lehnik-Habrink, M., Herzberg, C., Hubner, S.,  
522 and Stulke, J. (2011). A novel factor controlling bistability in *Bacillus subtilis* : the YmdB  
523 protein affects flagellin expression and biofilm formation. J. Bacteriol. 193, 5997–6007.
- 524 51. Winkelman, J.T., Bree, A.C., Bate, A.R., Eichenberger, P., Gourse, R.L., and Kearns, D.B. (2013).  
525 RemA is a DNA-binding protein that activates biofilm matrix gene expression in *Bacillus*  
526 *subtilis* . Mol. Microbiol. 88, 984–997.
- 527 52. Beauregard, P.B., Chai, Y., Vlamakis, H., Losick, R., and Kolter, R. (2013). *Bacillus subtilis*  
528 biofilm induction by plant polysaccharides. Proc. Natl. Acad. Sci. 110, 1621–1630.
- 529 53. Dobay, A., Bagheri, H.C., Messina, A., Kümmerli, R., and Rankin, D.J. (2014). Interaction  
530 effects of cell diffusion, cell density and public goods properties on the evolution of  
531 cooperation in digital microbes. J. Evol. Biol. 27, 1869–1877.
- 532 54. O’Connor, K.A., and Zusman, D.R. (1991). Development in *Myxococcus xanthus* involves  
533 differentiation into two cell types, peripheral rods and spores. J. Bacteriol. 173, 3318–33.
- 534 55. Lowery, N.V., McNally, L., Ratcliff, W.C., and Brown, S.P. (2017). Division of labor, bet  
535 hedging, and the evolution of mixed biofilm investment strategies. MBio 8.
- 536 56. Elsholz, A.K.W., Wacker, S.A., and Losick, R. (2014). Self-regulation of exopolysaccharide  
537 production in *Bacillus subtilis* by a tyrosine kinase. Genes Dev. 28, 1710–1720.
- 538 57. Krembs, C., and Engel, A. (2001). Abundance and variability of microorganisms and  
539 transparent exopolymer particles across the ice-water interface of melting first-year sea ice in  
540 the Laptev Sea (Arctic). Mar. Biol. 138, 173–185.
- 541 58. Erskine, E., Morris, R., Schor, M., Earl, C., Gillespie, R.M.C., Bromley, K., Sukhodub, T., Clark, L.,  
542 Fyfe, P., Serpell, L., *et al.* (2017). Formation of functional, non-amyloidogenic fibres by  
543 recombinant *Bacillus subtilis* TasA. bioRxiv, 188995.
- 544 59. Allen, B., Gore, J., and Nowak, M.A. (2013). Spatial dilemmas of diffusible public goods. Elife  
545 2, e01169.
- 546 60. Alteri, C.J., Himpfl, S.D., Pickens, S.R., Lindner, J.R., Zora, J.S., Miller, J.E., Arno, P.D., Straight,  
547 S.W., and Mobley, H.L.T. (2013). Multicellular bacteria deploy the type VI secretion system to  
548 preemptively strike neighboring cells. PLoS Pathog. 9, e1003608.
- 549 61. Štefanič, P., Kraigher, B., Lyons, N.A., Kolter, R., and Mandić-Mulec, I. (2015). Kin  
550 discrimination between sympatric *Bacillus subtilis* isolates. Proc. Natl. Acad. Sci. 112, 14042–



- 551 14047.
- 552 62. Rendueles, O., Zee, P.C., Dinkelacker, I., Amherd, M., Wielgoss, S., and Velicer, G.J. (2015).  
553 Rapid and widespread *de novo* evolution of kin discrimination. Proc. Natl. Acad. Sci. U. S. A.  
554 112, 9076–81.
- 555 63. Lyons, N.A., Kraigher, B., Štefanič, P., Mandić-Mulec, I., and Kolter, R. (2016). A combinatorial  
556 kin discrimination system in *Bacillus subtilis*. Curr. Biol. 26, 733–742.
- 557 64. Samad, T., Billings, N., Birjiniuk, A., Crouzier, T., Doyle, P.S., and Ribbeck, K. (2017). Swimming  
558 bacteria promote dispersal of non-motile staphylococcal species. ISME J. 11, 1933–1937.
- 559 65. Mhatre, E., Sundaram, A., Hölscher, T., Mühlstädt, M., Bossert, J., and Kovács, Á.T. (2017).  
560 Presence of calcium lowers the expansion of *Bacillus subtilis* colony biofilms. Microorganisms  
561 5, 7.
- 562 66. Dragoš, A., Lakshmanan, N., Martin, M., Horváth, B., Maróti, G., García, C.F., Lieleg, O., and  
563 Kovács, Á.T. (2017). Evolution of exploitative interactions during diversification in *Bacillus*  
564 *subtilis* biofilms. FEMS Microbiol. Ecol.
- 565 67. Rubinstein, S.M., Kolodkin-Gal, I., Mcloon, A., Chai, L., Kolter, R., Losick, R., and Weitz, D.A.  
566 (2012). Osmotic pressure can regulate matrix gene expression in *Bacillus subtilis*. Mol.  
567 Microbiol. 86, 426–436.
- 568 68. Shemesh, M., Kolter, R., and Losick, R. (2010). The biocide chlorine dioxide stimulates biofilm  
569 formation in *Bacillus subtilis* by activation of the histidine kinase KinC. J. Bacteriol. 192, 6352–  
570 6.
- 571 69. Hölscher, T., Dragoš, A., Gallegos-Monterrosa, R., Martin, M., Mhatre, E., Richter, A., and  
572 Kovács, Á.T. (2016). Monitoring spatial segregation in surface colonizing microbial  
573 populations. J. Vis. Exp.
- 574 70. Konkol, M.A., Blair, K.M., and Kearns, D.B. (2013). Plasmid-encoded ComI inhibits  
575 competence in the ancestral 3610 strain of *Bacillus subtilis*. J. Bacteriol. 195, 4085–4093.
- 576 71. Schindelin, J., Arganda-Carreras, I., Frise, E., Kaynig, V., Longair, M., Pietzsch, T., Preibisch, S.,  
577 Rueden, C., Saalfeld, S., Schmid, B., *et al.* (2012). Fiji: an open-source platform for biological-  
578 image analysis. Nat. Methods 9, 676–682.
- 579 72. López, D., Vlamakis, H., Losick, R., and Kolter, R. (2009). Paracrine signaling in a bacterium.  
580 Genes Dev. 23, 1631–8.
- 581 73. Murray, E.J., Strauch, M.A., and Stanley-Wall, N.R. (2009). X Is involved in controlling *Bacillus*  
582 *subtilis* biofilm architecture through the AbrB homologue Abh. J. Bacteriol. 191, 6822–6832.  
583  
584

585 **FIGURE LEGENDS**

586

587 Figure 1. **Costs and benefits of matrix components EPS and TasA.** (A) To estimate the metabolic costs  
588 of EPS and TasA production the matrix-deficient strains  $\Delta eps$  and  $\Delta tasA$  were competed against the  
589 WT and against each other under conditions where matrix components are produced but not required  
590 (see Methods). Relative fitness ( $W$ ) was calculated for  $\Delta eps$  (when competed against WT),  $\Delta tasA$   
591 (when competed against WT), and  $\Delta eps$  (when competed against  $\Delta tasA$ ). Relative fitness  $W$   
592 significantly larger than 1 indicates an advantage of a given strain in a given pair-wise competition. For  
593  $\Delta eps$  vs WT  $n=13$ ,  $p<0.003$ ; for  $\Delta tasA$  vs WT  $n=13$ ,  $p<0.008$ ; for  $\Delta tasA$  vs WT  $n=8$ ,  $p<0.007$  (\*\* $p<0.01$ , \*\*\*  
594  $p<0.001$ ). (B) Productivity of the WT,  $\Delta eps$ ,  $\Delta tasA$  and  $\Delta eps+\Delta tasA$  co-culture (50:50 ratio) measured  
595 as CFU/ml. Data points represent mean and error bars represent standard error obtained from  
596 biological triplicates. (C) Brightfield images of pellicle morphology developed by the WT, matrix-  
597 deficient mutants in monocultures and by the  $\Delta eps+\Delta tasA$  co-culture (50:50 ratio). The cartoons below  
598 represent public goods produced by each culture. (D) To confirm that EPS and TasA can be shared and  
599 thereby serve as public goods, the matrix-deficient strains  $\Delta eps$  and  $\Delta tasA$  were allowed to form  
600 pellicles in presence of spent media (SM) obtained from the WT or from the complementary mutant  
601 ( $n=4-6$ ). Pellicle productivity [CFU/ml] reached in presence of those SMs was compared with the  
602 productivity of the control (a strain exposed to its own SM): for  $\Delta eps$  + SM of WT  $p<5 \times 10^{-7}$ ;  $\Delta eps$  + SM  
603 of  $\Delta tasA$   $p<0.008$ ;  $\Delta tasA$  + SM of WT  $p<$ ;  $\Delta tasA$  + SM of  $\Delta eps$  SM  $p<0.001$  (\*\* $p<0.01$ ). Boxes represent  
604 Q1–Q3 (quartiles), lines represent the median, and bars span from max to min. To better distinguish  
605 between the matrix-deficient mutants, data for  $\Delta eps$  and  $\Delta tasA$  are presented in pink and blue,  
606 respectively.

607

608 Figure 2. **Native phenotypic heterogeneity in the expression of matrix components.** (A) Pellicles  
609 formed by the double-labelled strain carrying the  $P_{eps-gfp}$   $P_{tapA-mKate}$  reporters and the strain carrying  
610 the  $P_{tapA-gfp}$   $P_{tapA-mKate}$  reporters (control) were visualized using a confocal microscope to compare  
611 the distribution of fluorescence signal from different fluorescence reporters (GFP, mKate). (B)  
612 Volumes in GFP and mKate fluorescence channels (obtained by manual thresholding) were merged,  
613 dissected into cubes and the average intensities in the GFP and mKate channels for all cubes were  
614 plotted (see Methods). The maximum density is normalized to 1 and the contour lines correspond to  
615 0.05 decrease in density. (C) The following strains: NCIB3610, NRS2242 (carrying  $P_{eps-gfp}$ ), NRS3913  
616 (carrying  $P_{tapA-mKate}$ ), and NRS5832 (carrying  $P_{eps-gfp}$  and  $P_{tapA-mKate}$ ); were allowed to form pellicles  
617 and were then analyzed using flow cytometry. Bar chart (mean $\pm$ SD) represents fraction of OFF cells,  
618 cells expressing  $eps-gfp$ ,  $tapA-mKate$ , and cells expressing both reporters ( $n=3$ ).

619

620 **Figure 3. Productivity and fitness in pellicles with genetic division of labor. (A)** Productivities of  
621  $\Delta eps + \Delta tasA$  biofilms [CFU/ml] measured for different mixing ratios and compared to average  
622 productivity reached by the WT (black horizontal line with grey shaded 95 % confidence interval). The  
623 dashed line and green shaded 95% CI represent a cubic fit to the fitness data ( $F_{3,68} = 54.9$ ,  $R^2 = 0.695$ ,  
624  $p < 0.0001$ ). **(B)** The relative fitness of  $\Delta eps$  in competition with  $\Delta tasA$  followed a negative-frequency  
625 dependent trajectory, best described by a cubic fit (dashed line with 95 % CI:  $F_{3,46} = 94.7$ ,  $R^2 = 0.852$ ,  $p$   
626  $< 0.0001$ ).

627

628 **Figure 4. Genetic division of labor on plant roots. (A)** *Arabidopsis thaliana* roots were colonized by  
629 the WT,  $\Delta eps + \Delta tasA$  mix and the mutants in monocultures and biofilm productivities were measured  
630 as CFU/mm of root (for WT and co-culture  $n=6$ ; for  $\Delta eps$  and  $\Delta tasA$   $n=11$ ) (see Methods). The  
631 productivity reached by the  $\Delta eps + \Delta tasA$  mixture was compared with productivity of the WT ( $p < 0.04$ ).  
632 **(B)** *A. thaliana* roots were colonized by mixed cultures of  $WT_{GFP} + WT_{mKate}$  and  $\Delta eps_{GFP} + \Delta tasA_{mKate}$  and  
633 visualized using CLSM. Scale bar represents  $10\mu m$ . **(C)** Frequencies of each strain in the root-associated  
634 biofilm were determined based on image analysis (see Methods). Bars represent average ( $n=3-5$ ) and  
635 error bars represent standard error.

636

637 **Figure 5. Individual-based simulations identify drivers of genetic division of labor.** We simulated  
638 biofilm formation of the mutants  $\Delta eps$  (producing TasA) and  $\Delta tasA$  (producing EPS). Biofilms were  
639 initiated with eight cells, with  $\Delta eps$  frequency varying between 0 and 1, in steps of 0.125. Cells  
640 produced diffusible matrix components (either TasA or EPS) and grew according to their fitness  
641 functions. After 10,000 time steps, we measured the absolute productivity of the biofilm (no. of cells)  
642 and the relative fitness of the competing strains within biofilms. Fitness trajectories are shown as the  
643 best fit from linear models across 50 simulations for each condition ( $\pm 95\%$  confidence interval). **(A)**  
644 and **(B)** depict variation in biofilm productivity and relative fitness of mutants, respectively, as a  
645 function of strain frequency and the matrix diffusion coefficient, under conditions where both matrix  
646 components generate equal benefits. **(C)** and **(D)** show variation in biofilm productivity and relative  
647 fitness of mutants, respectively, as a function of strain frequency and different relative benefits of the  
648 two matrix components (diffusion coefficient  $d = 5$ ). Dashed lines and grey shaded area in **(D)** depict  
649 mean  $\pm 95\%$  CI productivities of WT biofilms across a range of metabolic constraints ( $f$ ).

650

651

652

## 653 STAR\*METHODS

654

## 655 CONTACT FOR REAGENT AND RESOURCE SHARING

656 *Further information and requests for resources and reagents should be directed to and will be*  
657 *fulfilled by the Lead Contact, Ákos T. Kovács (atkovacs@dtu.dk).*

658

## 659 EXPERIMENTAL MODEL AND SUBJECT DETAILS

660 All bacterial strains used in this study derived from *Bacillus subtilis* NCBI 3610 *comI*<sup>Q12I</sup> strain (Konkol  
661 et al., 2013). Strains were maintained in LB medium (Lysogeny broth (Lennox); Carl Roth, Germany),  
662 while MSgg medium was used for pellicle formation assay [35].

663

## 664 METHOD DETAILS

665

666 **Strain construction.** All strains that were used in this study or that were used solely as gDNA donors  
667 are listed in Table S1. To obtain TB601 and TB863, the NCBI 3610 *comI*<sup>Q12I</sup> was transformed with gDNA  
668 isolated from DL1032 selecting for Tet-resistant colonies or Km-resistant colonies, respectively.  
669 TB524.1 and TB525.2 were obtained by transforming TB601 with gDNA isolated from TB500.1 and  
670 TB501.1, respectively. TB538.1 and TB539.1 were obtained by transforming TB602 with gDNA isolated  
671 from TB500.1 and TB501.1, respectively. To obtain TB864 and TB865, NCBI 3610 *comI*<sup>Q12I</sup> was first  
672 transformed with gDNA from 168hymKate and then with gDNA isolated from NRS2242 and NRS3913,  
673 respectively. To obtain Anc Kate P<sub>eps</sub>-GFP, strain TB602 was first transformed with gDNA from  
674 168hymKate and then with gDNA from NRS2242. To obtain Anc Kate P<sub>tapA</sub>-GFP, strain TB 601 was first  
675 transformed with gDNA from 168hymKate and then with gDNA from NRS2394. In order to construct  
676 pTB848 and pTB849, the *eps* and *tapA* promoters were amplified using oTB172-oTB173 and oTB174-  
677 oTB175 primers pairs, respectively (see Table S2), the PCR products were digested with *EcoRI* and  
678 *NheI*, and cloned into the corresponding sites of vector pmKATerrnB. To obtain strains TB961 and  
679 TB962, first NCBI 3610 *comI*<sup>Q12I</sup> was transformed with gDNA from NRS2242, and the obtained strain  
680 (TB373) was transformed with plasmids pTB848 and pTB849, respectively. TB960 was constructed by  
681 transforming NCBI 3610 *comI*<sup>Q12I</sup> with gDNA from NRS3913 and the obtained strain (TB363) was  
682 subsequently transformed with pTB849 plasmid. To construct plasmid pTB498 harbouring a  
683 constitutively expressed mKATE2 gene, the P<sub>hyperspank</sub>-mKATE2 fragment was PCR amplified with  
684 primers oTH1 and oTH2 from plasmid phy-mKATE2 [43], digested with *XbaI* and *EcoRI*, ligated into  
685 plasmid pWK-Sp as described in [65]. Resulting plasmids were verified by sequencing and transformed  
686 into *B. subtilis* NCBI 3610 *comI*<sup>Q12I</sup>, resulting in TB539.

687 Plasmid pNW725 was used to construct strain NRS3913. This was generated through amplification of  
688 the *mKate2* coding region from plasmid pTMN387 using primers NSW1026 and NSW1027 (see Table  
689 S2) and ligation into plasmid pNW600 using *HinDIII* and *BamHI*. Plasmid pNW600 carries the *PtapA*  
690 promoter region (Murray et al., 2009), and therefore plasmid pNW725 has the *mKate2* coding region  
691 under the control of the *tapA* promoter region. Plasmid pNW725 was integrated into the chromosome  
692 of *B. subtilis* NCIB3610 at the *amyE* locus. Strain NRS5832 was generated by phage transduction of the  
693 *PepsA-gfp* reporter fusion from strain NRS2242 into NRS3913 as the recipient. Phage transduction was  
694 performed using SSP1 phage as previously described (Verhamme et al., 2007).

695

696 **Pellicle formation and productivity assays.** To obtain pellicle biofilms, bacteria were routinely growth  
697 in static liquid MSgg medium at 30°C for 48 hours, using 1% inoculum from overnight cultures.  
698 Productivities were accessed by examining colony forming units (CFUs) in mature pellicles. Prior each  
699 CFU assays, pellicles were sonicated according to a protocol optimized in our laboratory that allows  
700 proper disruption of biofilms without affecting cell viability [42,66]. To access relative frequencies of  
701  $\Delta eps$  and  $\Delta tasA$  strains, the cocultures were plated on selective antibiotics tetracycline (10 $\mu$ g/ml) and  
702 spectinomycin (100 $\mu$ g/ml), respectively.

703

704 **Fitness assays.** Since the expression of *epsA-O* and *tapA-sipW-tasA* operons strongly depend on  
705 cultivation conditions and media composition [32,52,65,67,68], we performed the competition  
706 experiment for the fitness costs of EPS and TasA production under the same conditions that were later  
707 used for the assays that involved pellicles. Strains of interest were premixed at 1:1 ratios based on  
708 their OD<sub>600</sub> values and the mixture was inoculated into MSgg medium at 1%. Cultures were grown  
709 under static conditions at 30°C. CFU assays (using selective antibiotics for the  $\Delta eps$  and  $\Delta tasA$  strains)  
710 were performed immediately after inoculation and after 16 hours of growth. The growth curves  
711 obtained at the initial stage of pellicle formation were performed under standard pellicle growth  
712 conditions in 96-well plates. The optical densities and GFP-fluorescence were monitored using an  
713 infinite F200PRO plate reader (TECAN Group Ltd, Männedorf, Switzerland).

714

715 **Spent media complementation assay.** The supernatants were obtained from the WT,  $\Delta eps$  and  $\Delta tasA$   
716 strains grown under static conditions in MSgg medium at 30°C for 48 hours. Cells were pelleted by  
717 centrifugation (5min, 8000 r.p.m.), the supernatants were sterilized using Millipore filters (0.2 $\mu$ m pore  
718 size), and mixed in 1:1 ratio with 2 times' concentrated MSgg medium. Surface colonization of the  
719  $\Delta eps$  and  $\Delta tasA$  in presence of conditioned media from the WT or complementary mutant strains were

720 compared with the negative controls where the mutants grew in presence of their own conditioned  
721 media.

722

723 **Microscopy/confocal laser scanning microscopy (CLSM).** Bright field images of whole pellicles and  
724 colonies were obtained with an Axio Zoom V16 stereomicroscope (Carl Zeiss, Jena, Germany)  
725 equipped with a Zeiss CL 9000 LED light source and an AxioCam MRm monochrome camera (Carl  
726 Zeiss). For time-lapse experiment, cultures were grown in 24-well plates (1.5 cm diameter per well),  
727 incubated in INUL-MS2-F1 incubator (Tokai Hit, Shizuoka, Japan) at 30 °C and images were recorded  
728 every 15 min. The detailed description of the fluorescence time lapse microscope has been previously  
729 published [69]. The pellicles were also analyzed using a confocal laser scanning microscope (LSM 780  
730 equipped with an argon laser, Carl Zeiss) and Plan-Apochromat/1.4 Oil DIC M27 63× objective.  
731 Fluorescent reporter excitation was performed with the argon laser at 488 nm and the emitted  
732 fluorescence was recorded at 484–536 nm and 567–654 nm for GFP and mKate, respectively. To  
733 generate pellicle images, Z-stack series with 1 µm steps were acquired. Zen 2012 Software (Carl Zeiss)  
734 was used for both stereomicroscopy and CLSM image visualization.

735

736 **Sample fixing and flow cytometry.** Pellicles were harvested at 24, 48, and 72 h into sterile 2 ml screw  
737 cap tubes, followed by centrifugation at 17000 g for 10 min. GTA buffer (50 mM glucose, 10 mM EDTA  
738 pH 8.0, and 20 mM Tris-HCl pH 8.0) was added into 24-well plates to harvest the cells remained in  
739 wells and pooled with cell pellet from previous step. Pooled cell pellets were then pumped through  
740 23G needles 6 times to disperse pellicles. Dispersed samples were pelleted down and fixed by  
741 incubation with 4% paraformaldehyde for 7 min at room temperature. Fixed samples were washed  
742 with GTA, and subjected to mild sonication prior flow cytometry. Flow cytometry (LSRFortessa™, BD  
743 biosciences) were operated by FACS facility in School of Life Sciences, University of Dundee.

744

745 **Root colonization assay/root biofilms productivity.** Colonization of *Arabidopsis thaliana* roots was  
746 performed according to modified protocol from [52]. Arabidopsis ecotype Col-0 seeds were surface  
747 sterilized using 2% (v/v) sodium hypochlorite solution as follows: seeds were incubated in 2% (v/v)  
748 sodium hypochlorite with mixing on an orbital shaker for 20 min and then washed five times with  
749 sterile distilled water. The seeds were placed on pre-dried MS agar plates (Murashige and Skoog basal  
750 salts mixture; Sigma) (2.2 g l<sup>-1</sup>) in an arrangement approximately 20 seeds per plate at a minimum  
751 distance of 1 cm. Seeds were germinated and grown on agar plates containing MS medium. After 3  
752 days of incubation at 4°C, plates were placed at an angle of 65° in a plant chamber (21°C, 16h light per  
753 day). After 6 days, homogenous seedlings ranging 0.8-1.2cm in length were selected for root

754 colonization assay. Seedlings were transferred into 48-well plates containing 270 $\mu$ l of MSNg medium  
755 [52]per well. Next the medium was supplemented with 30 $\mu$ l of exponentially growing bacterial culture  
756 diluted to OD<sub>650</sub> = 0.2. The sealed plates were incubated at rotary shaker at 28°C for 18h at 90 r.p.m.  
757 After the incubation, plants were washed 3 times with MSNg to remove non-attaching cells and then  
758 transferred to a glass slide for imaging using CLSM. To access root biofilm productivities, the roots  
759 were transferred into Eppendorf tubes, subjected to standard sonication protocol and the CFU assays  
760 were performed for obtained cell suspensions. To extract CFU/mm of root, the obtain CFU values were  
761 divided by total length of a corresponding root.

762

763 **Images of plant roots.** For biofilm roots visualization, the GFP and mKate images were converted into  
764 3D projections, contrast was enhanced using normalized function and green and red lookup tables  
765 were applied for GFP and mKate channels, respectively. Overlay images were obtained in ZEN software  
766 and further processed using ImageJ as follows: Brightness and contrast were adjusted, the root and  
767 biofilm area was manually selected and the background was lightened and smoothed using ‘adjust  
768 brightness’ and ‘smooth’ functions, respectively.

769

770 **Modelling.** We performed individual-based simulations, using the platform developed by Dobay et al.  
771 (2014). Microbial simulations occur on a two-dimensional toroidal surface with connected edges (i.e.  
772 there are no boundaries). The surface of the torus is 10,000  $\mu\text{m}^2$  (100 x 100  $\mu\text{m}$ ). Bacteria are modeled  
773 as discs with an initial diameter of 0.5  $\mu\text{m}$ . Bacteria can consume resources, grow at a basic growth  
774 rate ( $\mu = 1$ ) and divide when reaching the threshold diameter of 1  $\mu\text{m}$ . In our simulations, we assumed  
775 that resources are not limited. Bacteria further produce beneficial public goods at a cost  $c$  per  
776 molecule and at constant rate of 1 molecule/s. Public goods diffuse randomly according to the  
777 diffusion coefficient  $d$  ( $\mu\text{m}^2/\text{s}$ ) and following a Gaussian random walk. Public goods can decay with a  
778 certain probability  $p$ , with  $p$  increasing exponentially with time following the exponential function  $p =$   
779  $1 - e^{-w\Delta t/\partial}$ , where  $\Delta t$  is the age of the molecule,  $w$  the stiffness of the decay and  $\partial$  the durability of  
780 the molecule. Crucially, a public good can generate a benefit  $b$  to the cell that takes it up, which occurs  
781 when the cell and the public good physically overlap on the landscape. Bacteria can randomly disperse,  
782 too, defined by the diffusion coefficient  $D$  ( $\mu\text{m}^2/\text{s}$ ). Because we aimed to model bacterial performance  
783 in biofilms, where cell dispersal is low, we set  $D = 0.01 \mu\text{m}^2/\text{s}$ . Important to note is that neither bacteria  
784 nor public goods are bound to a grid, but move on a continuous landscape (following an off-lattice  
785 model with double-precision numbers). This mimics natural bacterial behavior as close as possible,  
786 but it also leads to cells overlapping with each other. To cope with this issue, we applied an overlap  
787 correction after each time step following the procedure described by [53].

788

789 Using this setup, we simulated the performance of a wildtype (WT) strain, producing two public goods  
790 representing EPS and TasA, and two strains (PG1 and PG2) producing only one of the two public goods.  
791 We arbitrarily considered PG1 = TasA producer and PG2 = EPS producer. The growth of the three  
792 strains is defined by the following recursive functions:

793

$$794 \quad G_{WT}(t + 1) = [\mu - f(c_1 + c_2) + b_1 \sum pg1 + b_2 \sum pg2 + b_3(\sum pg1 + R_{pg1})(\sum pg2 + R_{pg2})]G_{WT}(t) \quad (1)$$

795

$$796 \quad G_{PG1}(t + 1) = [\mu - c_1 + b_1 \sum pg1 + b_2 \sum pg2 + b_3(\sum pg1 + R_{pg1})(\sum pg2 + R_{pg2})]G_{PG1}(t) \quad (2)$$

797

$$798 \quad G_{PG2}(t + 1) = [\mu - c_2 + b_1 \sum pg1 + b_2 \sum pg2 + b_3(\sum pg1 + R_{pg1})(\sum pg2 + R_{pg2})]G_{PG2}(t) \quad (3)$$

799

800 where  $G$  is the radius increase per time step  $t$ ,  $\mu$  is the basic growth rate,  $c_1$  and  $c_2$  are the costs of  
801 producing the respective public goods, and  $f$  is the metabolic constraint factor, whereby  $f > 1$  if the  
802 simultaneous production of both public goods is costlier than producing either of the public goods  
803 alone. Furthermore, while  $b_1$  and  $b_2$  are the benefits accruing when a respective public good is taken  
804 up multiplied by the total number of public goods consumed ( $Spg1$  and  $Spg2$ ) per time step,  $b_3$  is the  
805 synergistic benefit accruing for all the complementary public goods taken up within a certain period  
806 of time ( $R_{pg1}$  and  $R_{pg2}$ , respectively). We arbitrarily chose five time steps for  $R_{pg1}$  and  $R_{pg2}$ .

807

808 For all simulations, we seeded our in-silico landscape with eight cells placed in the center of the  
809 landscape to mimic the early phase of pellicle formation. Cells then started to produce public goods,  
810 grew and divided defined by their growth function. We let bacteria grow for 10,000 time steps in 50  
811 independent replicates for each parameter combination. We examined three growth treatments,  
812 which included the WT strain in monoculture, the two complementary strains PG1 and PG2 in  
813 monocultures, and the two complementary strains PG1 and PG2 in mixed cultures. In the mixed  
814 cultures, we varied the starting frequency of the two strains from 1:7 (PG1 to PG2) to 7:1. For all  
815 simulations, we extracted the absolute productivity of the biofilm and the relative fitness of the  
816 competing strains within biofilms. To assess the role of public good diffusion on biofilm productivity  
817 and relative strain fitness, we varied public good diffusion from 3 to 7  $\mu\text{m}^2/\text{s}$  in steps of 0.5  $\mu\text{m}^2/\text{s}$ . To  
818 take into account that the public goods TasA and EPS might generate different benefits we varied the  
819  $b_1/b_2$  ratio from 1/9 to 1/1. Finally, we examined the effect of metabolic constraints on WT fitness by  
820 varying  $f$  from 1 to 1.3. All parameters together with the specific values used are given in the  
821 Supplementary Table S3.



822

## 823 **QUANTIFICATION AND STATISTICAL ANALYSIS**

824 **Relative fitness.** Relative fitness  $W_A$  for strain A in competition with strain B was calculated as  
825 follows:

$$826 \quad W_A = [\ln(\text{CFU}_{A_{16h}}/\text{CFU}_{A_{\text{start}}})]/[\ln(\text{CFU}_{B_{16h}}/\text{CFU}_{B_{\text{start}}})]$$

827 All replicates where one strain occurred to strongly dominate in the initial inoculum (exceeding initial  
828 0.8 frequency) were removed from the dataset.

829

830 **Strain frequencies on plant roots.** Ratios of the  $\Delta\text{eps}^{\text{GFP}}$  and  $\Delta\text{tasA}^{\text{mKate}}$  (and control with swapped  
831 fluorescent reporters) in root biofilms were estimated from the ratios of white pixel volumes  
832 measured on corresponding fluorescent images. Images were analyzed using ImageJ software. First,  
833 the root and biofilm area it was manually selected on the white-light image. For each channel, the  
834 stacks were converted into binary images and threshold was set up to  $> 0$  value. Next, the root+biofilm  
835 selection was activated on the processed stacks and total pixel volumes for each channel were  
836 extracted using 'stacks statistics' function.

837

838 **Density correlation.** The corresponding image stacks were dissected into cubes of 10px side length.  
839 For each channel, the biovolume per cube was obtained. For all cubes containing either biovolume in  
840 either of the two fluorescence channels (designated ch1 and ch2) the total biovolume in ch1 and ch2  
841 within a sphere of a given radius (1-5 $\mu\text{m}$ ) was summed up, multiplied and normalized by the total  
842 volume of the sphere.

843 The resulting value ranges from 0 (no correlation, no biomass in one of the channels) over 0.25 (50%  
844 of biomass in ch1, 50% of biomass in ch2) to 1 (cube is filled in both channels = 100% overlap).

845

846 **Statistical analysis.** For relative fitness assay, statistical differences from  $W=1$  were identified using  
847 one-sample Student's t-test. In case of productivity measurements statistical differences between two  
848 experimental groups were identified using two-tailed Student's t-tests assuming equal variance.  
849 Variances in the two main types of datasets (relative fitness, productivity) were similar across different  
850 samples. No statistical methods were used to predetermine sample size and the experiments were  
851 not randomized. All relevant data are available from the authors.

852

853

## 854 **KEY RESOURCES TABLE**

| Reagent or Resource | Source | Identifier |
|---------------------|--------|------------|
| <b>Chemicals</b>    |        |            |

|                                                                                                  |                                                              |                                                                     |
|--------------------------------------------------------------------------------------------------|--------------------------------------------------------------|---------------------------------------------------------------------|
| lysogeny broth (LB), Lennox                                                                      | Carl Roth GmbH                                               | X964.1                                                              |
| Agar-Agar                                                                                        | Carl Roth GmbH                                               | 5210.3                                                              |
| Potassium Hydrogen Phosphate                                                                     | Carl Roth GmbH                                               | P749.1                                                              |
| Potassium Dihydrogen Phosphate                                                                   | Carl Roth GmbH                                               | 3904.2                                                              |
| L-Glutamic acid Monopotassium salt monohydrate                                                   | Alfa Aesar                                                   | 17232                                                               |
| Magnesium chloride hexahydrate                                                                   | Carl Roth GmbH                                               | 2189.1                                                              |
| Potassium chloride                                                                               | Carl Roth GmbH                                               | 6781.3                                                              |
| Calcium chloride                                                                                 | Carl Roth GmbH                                               | 5239.2                                                              |
| Manganese(II) chloride                                                                           | Carl Roth GmbH                                               | T881.3                                                              |
| Iron(III) chloride                                                                               | Carl Roth GmbH                                               | P742.1                                                              |
| Zinc chloride                                                                                    | Carl Roth GmbH                                               | T887.1                                                              |
| Ammonium chloride                                                                                | Carl Roth GmbH                                               | K298.2                                                              |
| Thiamin                                                                                          | Carl Roth GmbH                                               | T911.1                                                              |
| MOPS                                                                                             | Carl Roth GmbH                                               | 6979.4                                                              |
| Glycerol                                                                                         | Carl Roth GmbH                                               | 7533.1                                                              |
| Murashige and Skoog medium (MS)                                                                  | Sigma Aldrich                                                | M5519                                                               |
| Sodium hypochlorite                                                                              | Carl Roth GmbH                                               | 9062.3                                                              |
| Tetracycline hydrochloride                                                                       | Carl Roth GmbH                                               | 0237.1                                                              |
| Spectinomycin dihydrochloride                                                                    | Alfa Aesar                                                   | J61820                                                              |
| Glucose                                                                                          | Fisher Scientific                                            | G/0500/61                                                           |
| EDTA                                                                                             | VWR                                                          | 20302.260                                                           |
| Tris                                                                                             | VWR                                                          | 103157P                                                             |
| HCl                                                                                              | VWR                                                          | 20252.335                                                           |
| <b>Experimental Models: Organisms/Strains</b>                                                    |                                                              |                                                                     |
| <i>Bacillus subtilis</i> NCBI 3610 <i>comI</i> <sup>Q12I</sup>                                   | [70]                                                         | DK1042                                                              |
| <i>Bacillus subtilis</i> NCBI 3610 <i>comI</i> <sup>Q12I</sup> derivatives (listed in Table S2). | This study                                                   | N/A                                                                 |
| <i>Arabidopsis thaliana</i> Col-0                                                                | Greenhouse of Max Plank Institute for Chemical Ecology, Jena | N/A                                                                 |
| <b>Recombinant DNA</b>                                                                           |                                                              |                                                                     |
| pmKATerrnB                                                                                       | [43]                                                         | Genbank Accession number: KF245454                                  |
| pTB848                                                                                           | This study                                                   | N/A                                                                 |
| pTB849                                                                                           | This study                                                   | N/A                                                                 |
| pTB498                                                                                           | This study                                                   | N/A                                                                 |
| pNW725                                                                                           | This study                                                   | N/A                                                                 |
| <b>Sequence-Based Reagents</b>                                                                   |                                                              |                                                                     |
| Primers used in this study are listed in Table S3.                                               | This study                                                   | N/A                                                                 |
| <b>Software and Algorithms</b>                                                                   |                                                              |                                                                     |
| ImageJ                                                                                           | [71]                                                         | <a href="https://imagej.nih.gov/ij/">https://imagej.nih.gov/ij/</a> |
| OriginPro 2015G                                                                                  | OriginLab, Northampton, MA                                   | <a href="http://www.originlab.com/">http://www.originlab.com/</a>   |

856 **Supplementary Tables**

857

858 **Table S1. Bacterial strains used during experiments or as a source of genomic DNA**

| Strain name                             | Genotype                                                                                                                                  | Reference      |
|-----------------------------------------|-------------------------------------------------------------------------------------------------------------------------------------------|----------------|
| DL1032                                  | <i>eps::tet, tasA::Km, amyE::P<sub>srfAA</sub>-lacZ (ery)</i>                                                                             | [72]           |
| NCIB3610                                | <i>Prototroph</i>                                                                                                                         | NSW laboratory |
| TB601                                   | 3610 <i>comI<sup>Q121</sup> eps::tet</i>                                                                                                  | This work      |
| TB602                                   | 3610 <i>comI<sup>Q121</sup> tasA::spec</i>                                                                                                | [65]           |
| TB863                                   | 3610 <i>comI<sup>Q121</sup> tasA::kan</i>                                                                                                 | This work      |
| TB500                                   | 3610 <i>comI<sup>Q121</sup> amyE::P<sub>hyperspank</sub>-GFP (Spec<sup>R</sup>)</i>                                                       | [65]           |
| TB501                                   | 3610 <i>comI<sup>Q121</sup> amyE::P<sub>hyperspank</sub>-mKate (Spec<sup>R</sup>)</i>                                                     | This work      |
| TB524                                   | 3610 <i>comI<sup>Q121</sup> eps::tet amyE::P<sub>hyperspank</sub>-GFP (Spec<sup>R</sup>)</i>                                              | This work      |
| TB525                                   | 3610 <i>comI<sup>Q121</sup> eps::tet amyE::P<sub>hyperspank</sub>-mKate (Spec<sup>R</sup>)</i>                                            | This work      |
| TB538                                   | 3610 <i>comI<sup>Q121</sup> tasA::kan amyE::P<sub>hyperspank</sub>-GFP (Spec<sup>R</sup>)</i>                                             | This work      |
| TB539                                   | 3610 <i>comI<sup>Q121</sup> tasA::kan amyE::P<sub>hyperspank</sub>-mKate (Spec<sup>R</sup>)</i>                                           | This work      |
| 168hymKate                              | 168 <i>amyE::P<sub>hyperspank</sub>-mKATE2 (Cm<sup>R</sup>)</i>                                                                           | [43]           |
| TB864                                   | 3610 <i>comI<sup>Q121</sup> amyE::P<sub>hyperspank</sub>-mKate (Cm<sup>R</sup>) sacI::P<sub>eps</sub>-gfp (Km<sup>R</sup>)</i>            | This work      |
| TB865                                   | 3610 <i>comI<sup>Q121</sup> amyE::P<sub>hyperspank</sub>-mKate (Cm<sup>R</sup>) sacI::P<sub>tapA</sub>-gfp (Km<sup>R</sup>)</i>           | This work      |
| Anc Kate<br><i>P<sub>eps</sub>-GFP</i>  | 3610 <i>comI<sup>Q121</sup> tasA::spec amyE::P<sub>hyperspank</sub>-mKate (Cm<sup>R</sup>) sacI::P<sub>eps</sub>-gfp (Km<sup>R</sup>)</i> | This work      |
| Anc Kate<br><i>P<sub>tapA</sub>-GFP</i> | 3610 <i>comI<sup>Q121</sup> eps::tet amyE::P<sub>hyperspank</sub>-mKate (Cm<sup>R</sup>) sacI::P<sub>tapA</sub>-gfp (Km<sup>R</sup>)</i>  | This work      |
| TB960                                   | 3610 <i>comI<sup>Q121</sup> amyE::P<sub>tapA</sub>-mKate (Cm<sup>R</sup>) sacI::P<sub>eps</sub>-gfp (Km<sup>R</sup>)</i>                  | This work      |
| TB961                                   | 3610 <i>comI<sup>Q121</sup> amyE::P<sub>eps</sub>-mKate (Cm<sup>R</sup>) sacI::P<sub>tapA</sub>-gfp (Km<sup>R</sup>)</i>                  | This work      |
| TB962                                   | 3610 <i>comI<sup>Q121</sup> amyE::P<sub>tapA</sub>-mKate (Cm<sup>R</sup>) sacI::P<sub>tapA</sub>-gfp (Km<sup>R</sup>)</i>                 | This work      |
| NRS2394                                 | 3610 <i>sacA::P<sub>tapA</sub>-gfp (Km<sup>R</sup>)</i>                                                                                   | [73]           |
| NRS3913                                 | 3610 <i>amyE::P<sub>tapA</sub>-mKate2 (Cm<sup>R</sup>)</i>                                                                                | This work      |
| NRS2242                                 | 3610 <i>sacI::P<sub>eps</sub>-gfp (Km<sup>R</sup>)</i>                                                                                    | [73]           |
| NRS5832                                 | 3610 <i>sacI::P<sub>eps</sub>-gfp (Km<sup>R</sup>) amyE::P<sub>tapA</sub>-mKate2 (Cm<sup>R</sup>)</i>                                     | This work      |

859

860

861 **Table S2. Primers used in this study**

862

| Primer | Experimental purpose                         | Sequence                                     |
|--------|----------------------------------------------|----------------------------------------------|
| oTB172 | Cloning <i>eps</i> promoter into pmKATerrnB  | CACGAATTCCAACAGCCAGCTGATTAAT<br>AG           |
| oTB173 | Cloning <i>eps</i> promoter into pmKATerrnB  | CTGAGCTAGCCATTTCTCTCCTCCTCC<br>CGCGGCTGGCTTC |
| oTB174 | Cloning <i>tapA</i> promoter into pmKATerrnB | CACGAATTCCTTCCCTCAGAGTTAAAT<br>G             |

|         |                                                    |                                                     |
|---------|----------------------------------------------------|-----------------------------------------------------|
| oTB175  | Cloning <i>tapA</i> promoter into pmKATerrnB       | CTGAGCTAGCCATTTCTCTCCTCCTGTA<br>AAACTGTAAAC         |
| oTH1    | Cloning P <sub>hyperspank</sub> -mKate into pWK-Sp | GCATCTAGAGTTGCTCGCGGGTAAATG<br>TG                   |
| oTH2    | Cloning P <sub>hyperspank</sub> -mKate into pWK-Sp | CGAGAATTCATCCAGAAGCCTTGCATAT<br>C                   |
| NSW1026 | Amplification <i>mKate2</i> from plasmid pTMN387   | GTACAAGCTTAAGGAGGAACTACTATG<br>GATTCAATAGAAAAGGTAAG |
| NSW1027 | Amplification <i>mKate2</i> from plasmid pTMN387   | GTACGGATCCTTATCTGTGCCCCAGTTT<br>GCT                 |

863

864

865 **Table S3. Parameters and specific values used in modeling**

866

| <b>Parameter</b> | <b>Description</b>              | <b>Value(s)</b>                |
|------------------|---------------------------------|--------------------------------|
| $\mu$            | basic growth rate               | 1                              |
| $D$              | cell diffusion                  | 0.01                           |
| $d$              | public good diffusion           | 3 - 7 $\mu\text{m}^2/\text{s}$ |
| $\omega$         | stiffness of decay function     | 0.1                            |
| $\delta$         | public good durability          | 500 s                          |
| $c_1$            | cost of public good 1 (TasA)    | 0.0005 per molecule            |
| $c_2$            | cost of public good 2 (EPS)     | 0.0005 per molecule            |
| $f$              | metabolic constraint factor     | 1 - 1.3                        |
| $b_1$            | benefit of public good 1 (TasA) | 0.0001 - 0.0009                |
| $b_2$            | benefit of public good 2 (EPS)  | 0.0001 - 0.0009                |
| $b_3$            | synergistic benefit             | 0.0005                         |

867

868

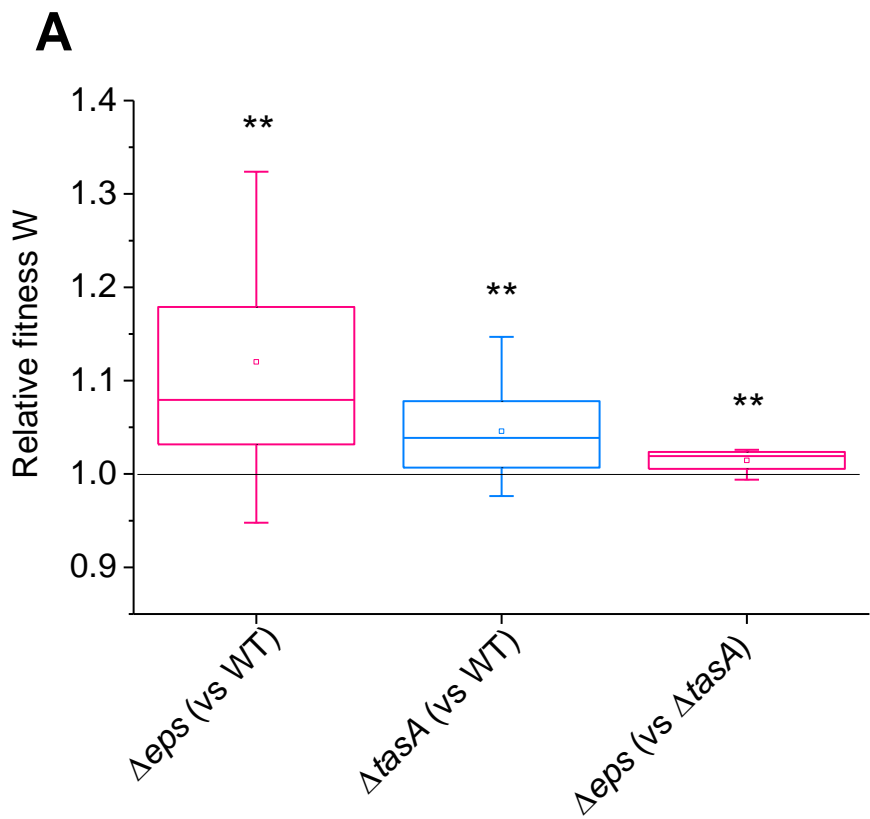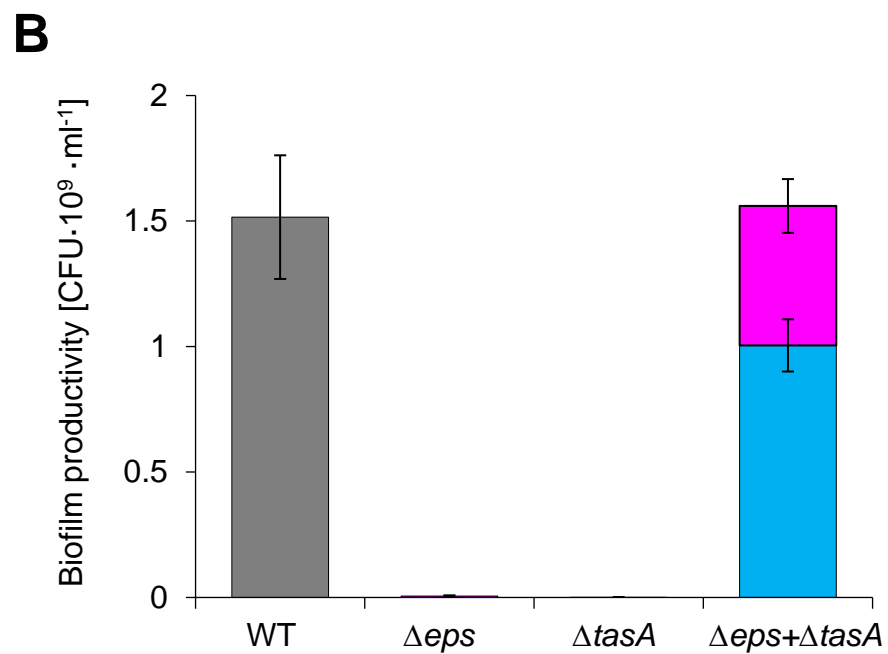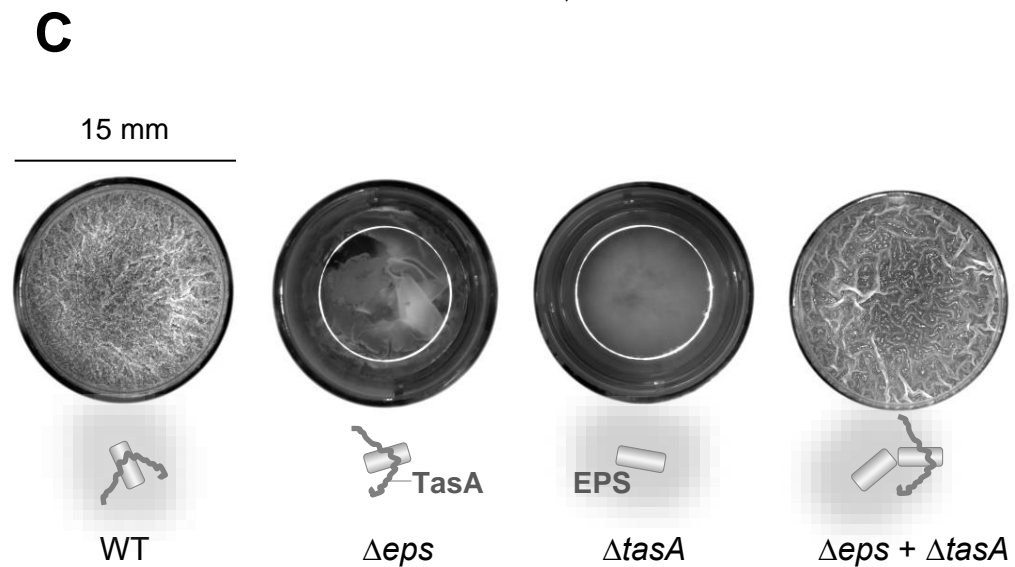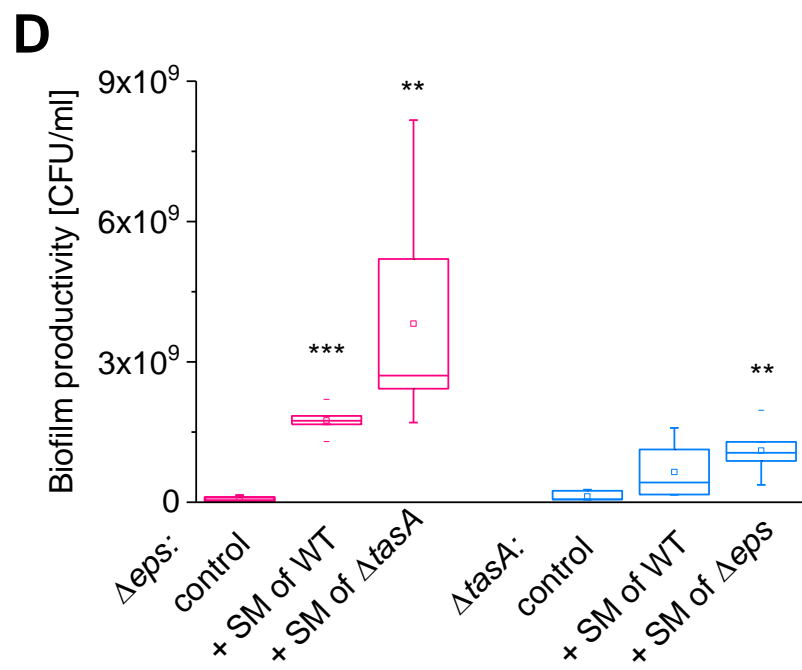

**A**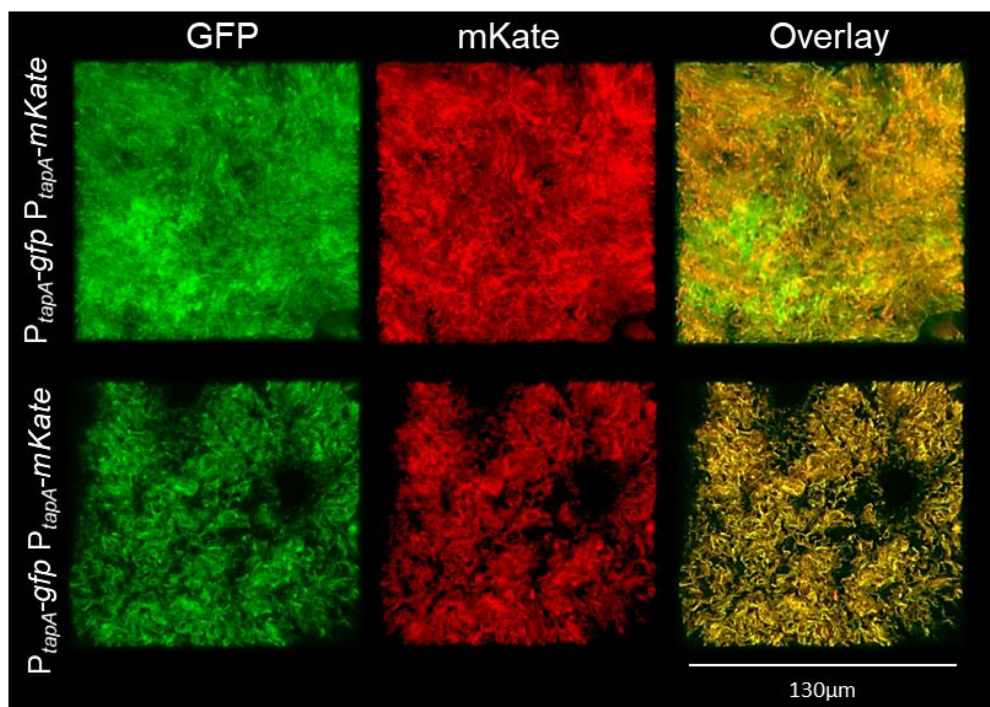**B**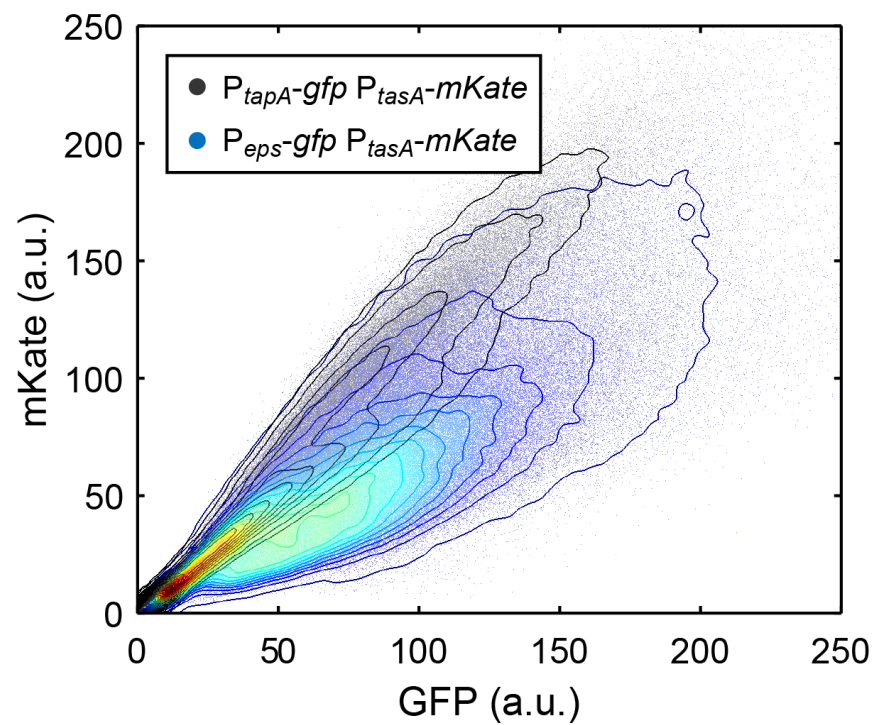**C**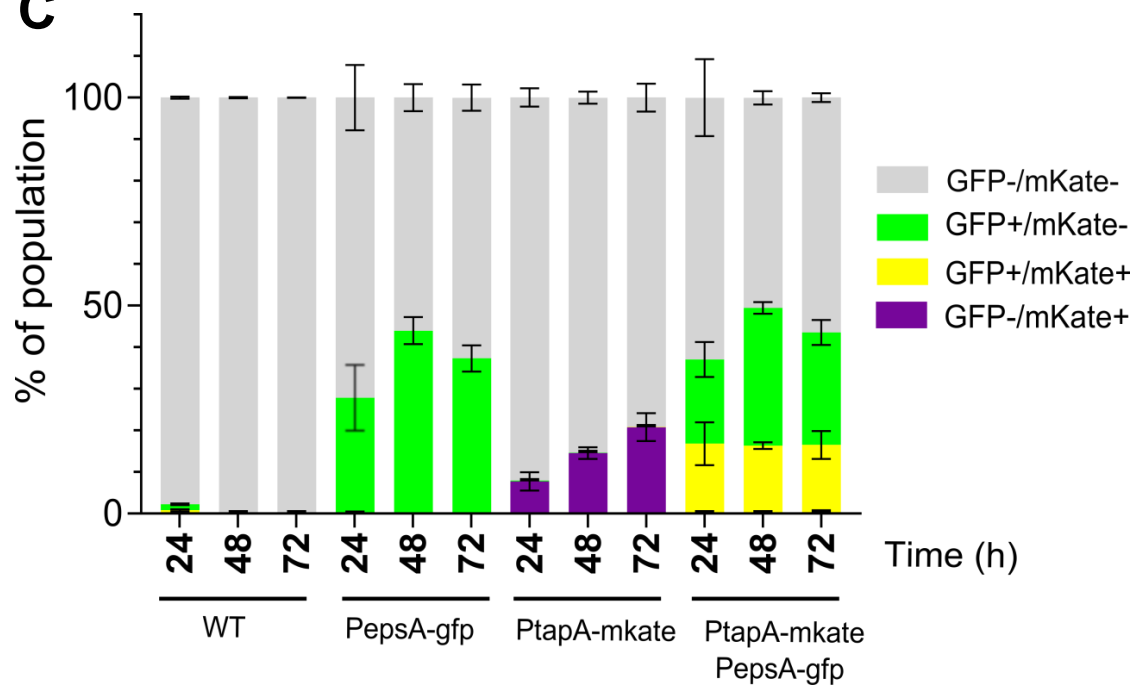

**A**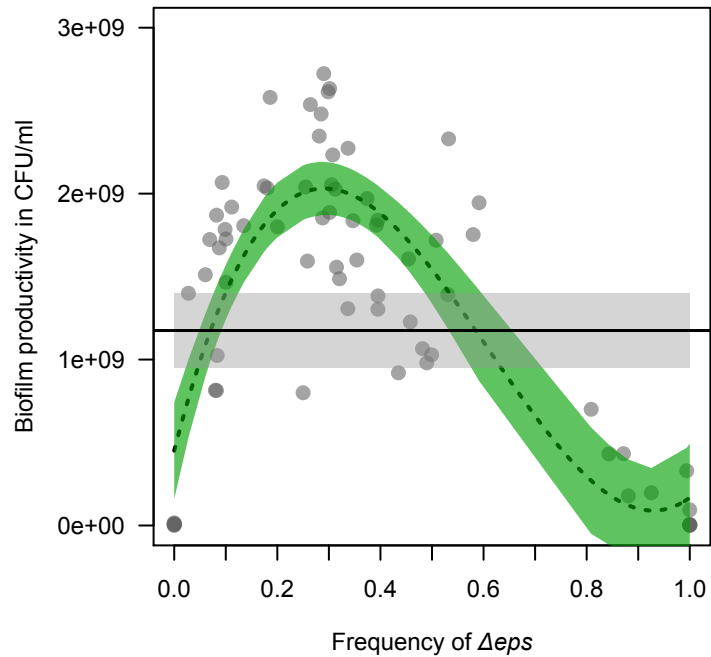**B**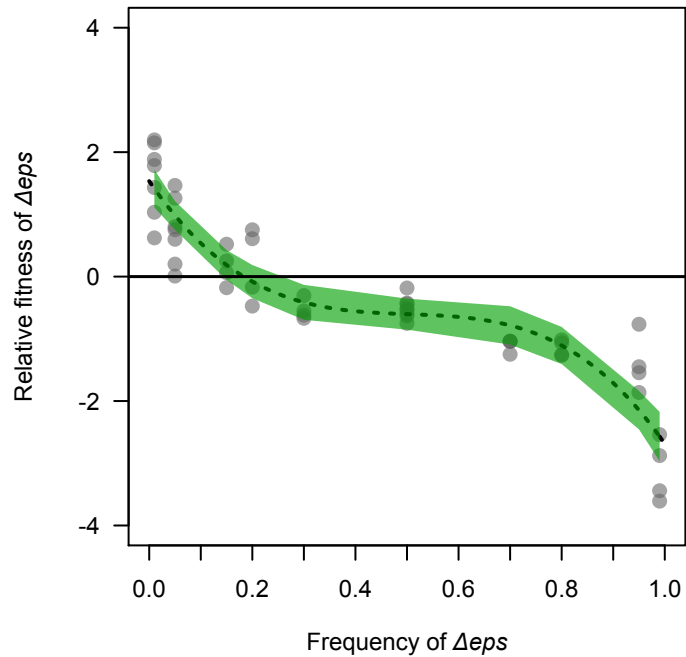

**A**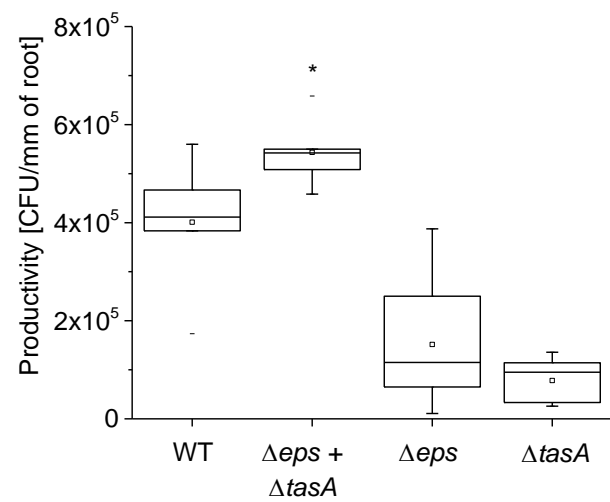**B**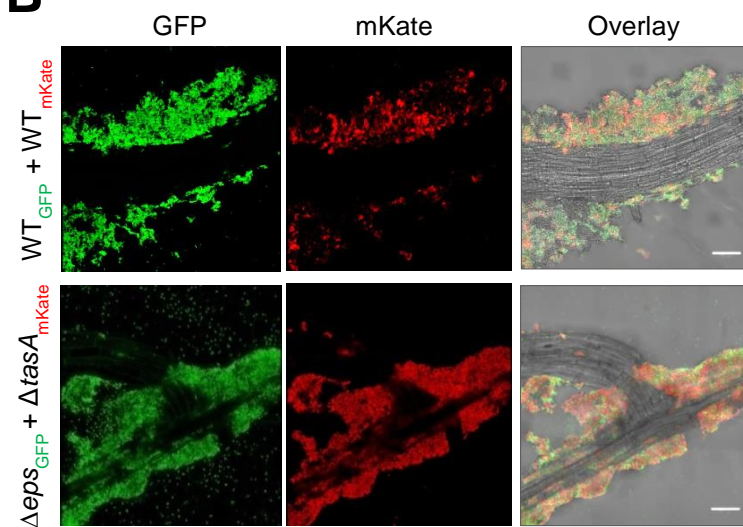**C**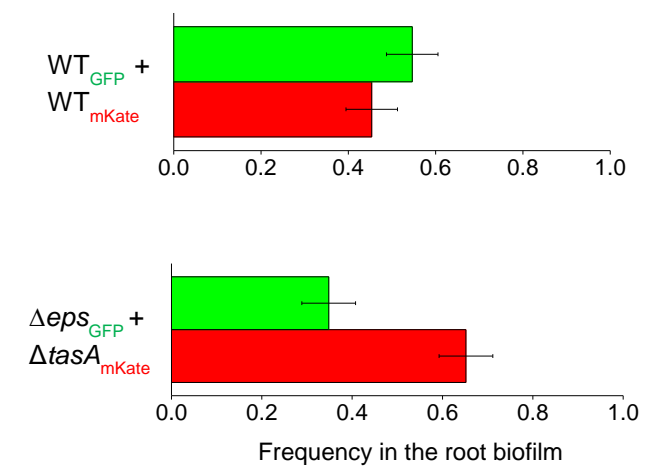



**A**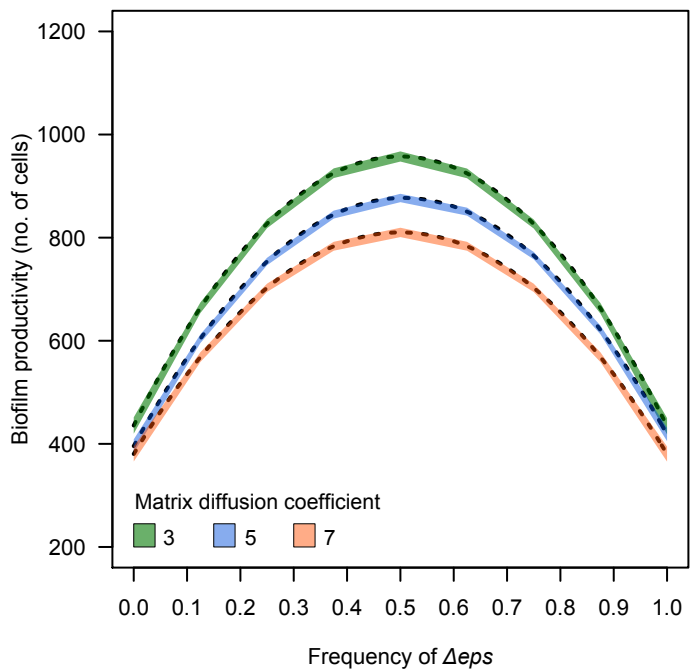**B**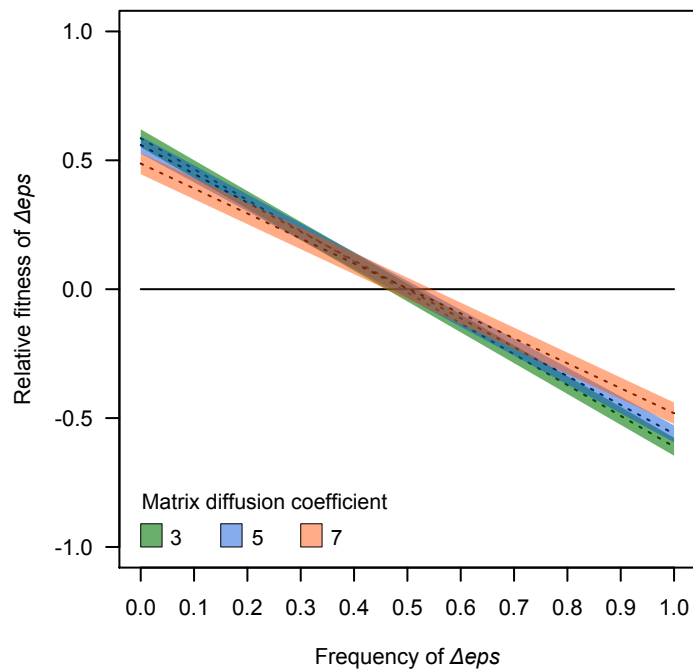**C**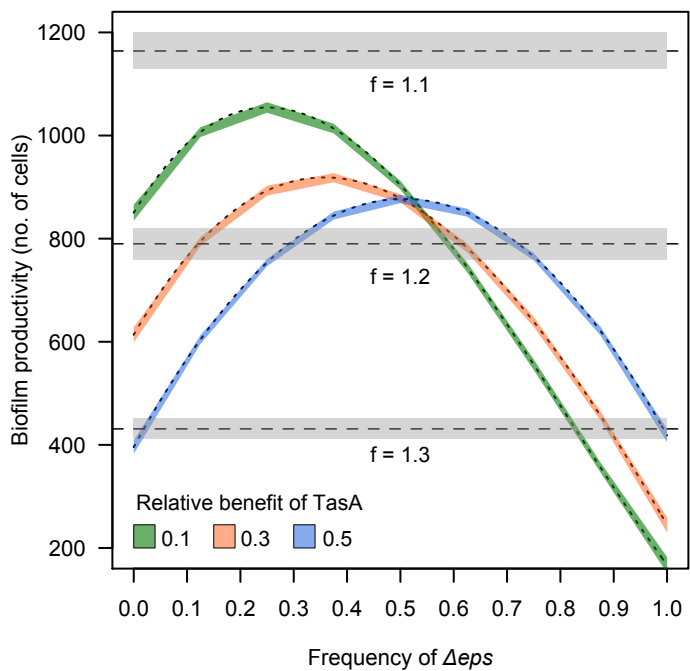**D**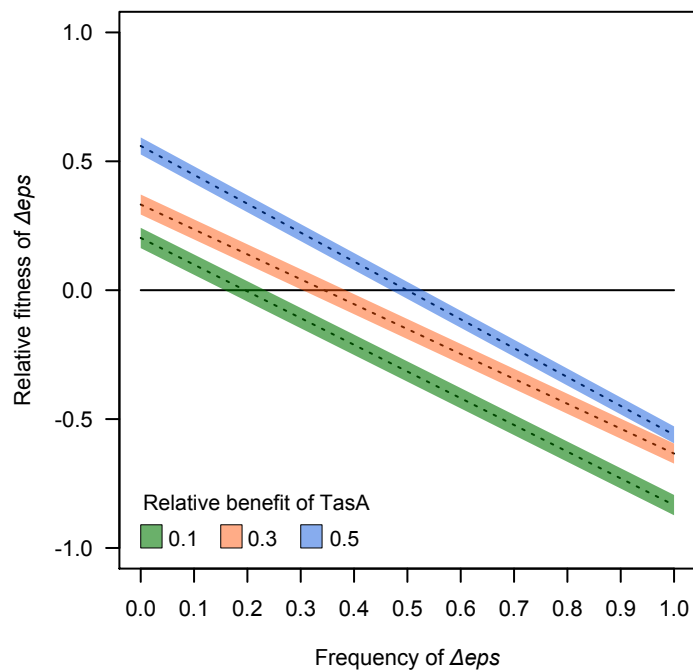

Source: https://www.biorxiv.org/content/10.1101/237230v1.full.pdf
